1 **T606-phosphorylation deprives the function of Kaiso as a transcription and**  
2 **oncogenic factor**

3 Wei Tian<sup>1,2</sup>, Hongfan Yuan<sup>1</sup>, Sisi Qin<sup>1</sup>, Wensu Liu, Baozhen Zhang, Liankun Gu, Jing Zhou, Dajun  
4 Deng<sup>2</sup>

5 Key Laboratory of Carcinogenesis and Translational Research (Ministry of Education/Beijing),  
6 Division of Cancer Etiology, Peking University Cancer Hospital and Institute, China

7 **Running title:** Phosphorylation of Kaiso at T606 by AKT1

8 <sup>1</sup> These authors contributed equally to this work.

9 <sup>2</sup> Correspondence: Key Laboratory of Carcinogenesis and Translational Research (Ministry of  
10 Education/Beijing), Division of Cancer Etiology, Peking University Cancer Hospital and Institute,  
11 Fu-Cheng-Lu #52, Beijing, 100142, China, Dajun Deng (E-mail: dengdajun@bjmu.edu.cn,  
12 Tel:86-10-88196752, Fax: 86-10-88122437) or Wei Tian (tianwei@bjmu.edu.cn, Tel:86-10-88196721,  
13 Fax: 86-10-88122437)

14

1 **Abbreviations**

- 2 BSA: bovine serum albumin
- 3 CIAP: calf intestinal alkaline phosphatase
- 4 CY5: Cyanine5
- 5 DAPI: 4', 6-diamidino-2-phenylindole
- 6 ELISA: enzyme-linked immunosorbent assay
- 7 FITC: fluorescein isothiocyanate
- 8 HC: Heavy chain of IgG
- 9 IP: immunoprecipitation
- 10 KBS: Kaiso binding sequence
- 11 NOD-SCID mice: Non-obese diabetic/severe combined immunodeficient mice
- 12 P120ctn: P120 catenin (CTNND1)
- 13 pAKT-Sub: phosphorylated AKT substrate
- 14 PBS: Phosphate-buffered saline
- 15 Phos-tag: Phos-tag molecular binds specifically to phosphate group in proteins via metal ions
- 16 pT606: T606-phosphorylated
- 17 T606A: replacement of the 606th amino acid residue threonine with alanine
- 18 wt: wildtype
- 19

## 1 ABSTRACT

2 It is well known that Kaiso protein encoded by *ZBTB33* gene is a transcription repressor and that  
3 Kaiso–P120ctn interaction increases the shift of Kaiso from the nucleus into the cytoplasm. However,  
4 the regulatory mechanisms of Kaiso compartmentalization are far from clear. Here, we reported that  
5 AKT1 could phosphorylate 606-threonine residue (T606) within the RSSTIP motif of Kaiso in the  
6 cytoplasm. The T606-phosphorylated Kaiso (pT606-Kaiso) could directly bind to 14-3-3 family  
7 proteins and the depletion of T606 phosphorylation by T606A mutation abolished most of the  
8 Kaiso–14-3-3 binding. In addition, the Kaiso–P120ctn interaction was essential for the pT606-Kaiso  
9 accumulation in the cytoplasm. Notably, enforced *14-3-3σ* (*SFN*) overexpression could increase the  
10 pT606-Kaiso accumulation in the cytoplasm and de-repress the transcription of Kaiso target gene  
11 *CDH1*. Decreased amounts of both pT606-Kaiso and CDH1 proteins were frequently observed in  
12 human gastric cancer tissues relative to paired normal controls. The mRNA levels of *14-3-3σ* and  
13 Kaiso target gene *CDH1* were positively and significantly correlated with each other in bioinformatics  
14 analyses using publicly available RNA-seq datasets for human normal tissues ( $n=11688$ ,  $r=0.60$ ,  
15  $p<0.001$ ) in the GTEx project and for cancer cell lines ( $n=1156$ ,  $r=0.41$ ,  $p<0.001$ ) in the CCLE project.  
16 Furthermore, Kaiso T606A mutant (unable to be phosphorylated) significantly increased the migration  
17 and invasion of cancer cells *in vitro* as well as boosted the growth of these cells *in vivo*. In conclusion,  
18 Kaiso could be phosphorylated by AKT1 at the T606 and the pT606-Kaiso accumulates in the  
19 cytoplasm through binding to 14-3-3/P120ctn that de-represses the expression of Kaiso target gene  
20 *CDH1* in normal tissues. Decreased Kaiso phosphorylation may contribute to the development of  
21 gastrointestinal cancer. The status of Kaiso phosphorylation is a determinant factor for the role of Kaiso  
22 in the development of cancer.

23 **Keywords:** Kaiso, phosphorylation, AKT1, 14-3-3 proteins, P120ctn, transcription factor, cancer  
24

## 1 INTRODUCTION

2 Kaiso protein encoded by the *ZBTB33* gene (chrX:119,384,607-119,392,251) is a classic transcription  
3 repressor containing a zinc-finger domain and a BTB/POZ domain (1). The zinc-finger domain of  
4 Kaiso can bind to both methylated CGCG-containing and non-methylated Kaiso binding-specific  
5 sequences of Kaiso target genes, and the BTB/POZ domain can further recruit the complex of NCoR1  
6 corepressor and histone deacetylases to target genes and repress their transcription in the nucleus (2-4).  
7 Recent studies show that Kaiso may also act as a transcription activator in the promoter  
8 context-dependent manner (5, 6).

9 As a transcription repressor, Kaiso controls the cell cycle through repressing *CCND1* and *CCNE1*  
10 expression, affects Notch signaling pathway in intestinal cells through targeting *DLL1* and *JAG1*  
11 promoter, and inhibits the proliferation and invasion of tumor cells through downregulating *MMP7*,  
12 *MTA2* and other genes (7-10). Kaiso also represses *CDHI* and *CDKN2A* expression (11, 12).  
13 Interestingly, it has been reported that the amount of nuclear Kaiso, but not total Kaiso, is correlated  
14 with the invasion or prognosis of cancers (13, 14). Kaiso-deficient mice show resistance to intestinal  
15 cancer (15). Apparently, the expression and subcellular location states of Kaiso determine its normal  
16 functions and roles in cancer development.

17 Kaiso is also a cytoplasm protein, which regulates WNT-related pathway through interacting with  
18 P120ctn (CTNND1) protein (Fig. S1) (1, 16). Differences of subcellular locations of Kaiso are  
19 observed between cultured cells and tissues (12, 17). The P120ctn-Kaiso complexes could shift from  
20 the nucleus to the cytoplasm (18). Kaiso nuclear-cytoplasmic trafficking could be affected by  
21 environmental factors, such as cigarette smoke, through MUC1 and P120ctn binding (19). However,  
22 detailed regulation machinery for the compartmentalization of Kaiso remains far from clear.

23 The 14-3-3 proteins are originally identified in the brain (20). There are seven human 14-3-3  
24 isoforms ( $\alpha/\beta$ ,  $\epsilon$ ,  $\eta$ ,  $\delta/\gamma$ ,  $\tau$ ,  $\zeta$ ,  $\sigma$ ). These 14-3-3 isoforms are homologous proteins with approximately 50%  
25 amino acid identity, capable of forming either homo- or hetero-dimers (21-24). Recent findings have  
26 implicated 14-3-3 proteins as a key regulator of signal transduction events (25). Among the family,  
27 14-3-3 $\gamma$  and 14-3-3 $\sigma$  (SFN) have been confirmed to play important roles in cancer development

1 (26-29).

2 In the present study, we found, for the first time, that Kaiso could be phosphorylated at Thr-606  
3 (T606) within the RSSTIP motif by the protein serine-threonine kinase AKT1 and  
4 T606-phosphorylated Kaiso (pT606-Kaiso) could efficiently interact with 14-3-3 family member and  
5 P120ctn proteins, and accumulate in the cytoplasm that in turn blocks transcription repressor function  
6 of Kaiso and de-repressed the expression of its target gene *CDHI*. Relative to the paired normal control  
7 tissues, the level of pT606-Kaiso was markedly decreased in human gastric tissues that could lead to  
8 transcriptional repression of the *CDHI* gene.

## 9 **MATERIALS and METHODS**

### 10 **Cell lines and culture**

11 The gastric cancer cell lines MGC803, BGC823, and SGC7901 were kindly provided by Dr. Yang Ke  
12 at Peking University Cancer Hospital; MKN45 cell line was purchased from the National Infrastructure  
13 of Cell Line Resource (Beijing, China). The human embryonic kidney HEK293T cell line was kindly  
14 provided by Professor Yasuhito Yuasa at Tokyo Medical and Dental University; RKO cell line, by Dr.  
15 Guoren Deng, University of California. HEK293T cells was cultured in DMEM medium containing 10%  
16 FBS, and all the others were cultured in RPMI1640 medium containing 10% FBS and 100 U/mL  
17 penicillin/streptomycin (Life Technologies, Carlsbad, CA, USA) at 37 °C in a humidified incubator  
18 with 5% CO<sub>2</sub>. These cell lines were tested and authenticated by Beijing JianLian Gene Technology Co.,  
19 before use. Short tandem repeat (STR) patterns were analyzed using Goldeneye™20A STR Identifier  
20 PCR Amplification Kit.

### 21 **Gastric carcinoma tissues and ethical issue**

22 Gastric cancer tissues and the paired normal surgical margin tissues were collected from 12 patients at  
23 Peking University Cancer Hospital from 2000 to 2001 and stored at -80 °C. The Institutional Review  
24 Board of the Peking University Cancer Hospital approved the study. All of the patients provided written  
25 informed consent.

### 26 **Plasmids and reagents**

1 The full-length Kaiso-coding sequence of the *ZBTB33* gene was amplified from human cDNA of  
2 MGC803 cells with a primer set (forward 5'-attaactcgaggcatggagagtagaaaactga-3' and reverse  
3 5'-cgcttcgaattcgtttagtaagactctggtattat-3'), then inserted into *XhoI* and *EcoRI* sites of pEGFP-C1 vector  
4 to generate pEGFP-C1-Kaiso expression vector. pEGFP-C1-Kaiso-T606 mutants were obtained by  
5 mutation PCRs using a primer set (forward 5'-gatagatcaagcgctattctgcaatg -3' and reverse  
6 5'-cattgcaggaatagcgttgatctatc-3') for 606Thr → Ala (T606A) mutation. Plasmid  
7 pCMV-3Tag-2C-Kaiso was generated by inserting the full-length Kaiso-coding sequence into *BamHI*  
8 and *EcoRI* sites of pCMV-3Tag-2C vector. Plasmid pEBG-GST-Kaiso was generated by inserting the  
9 full-length Kaiso coding sequence into *BamHI* and *NotI* sites of pEBG vector.

10 pcDNA3.1-HA-AKT1 vector was purchased from Addgene (#9008, MA, USA);  
11 pEZ-M56-14-3-3 $\gamma$ -mCherry, pEZ-M56-14-3-3 $\sigma$ -mCherry vectors, from FulenGen (EX-T4084-M56,  
12 EX-T4084-M98-5, EX-C0507-M98, Guangzhou, China); pENTER-Flag-14-3-3 isoforms ( $\alpha/\beta$ ,  $\epsilon$ ,  $\eta$ ,  $\delta/\gamma$ ,  
13  $\tau$ ,  $\zeta$ ,  $\sigma$ ) were purchased from Vigene Bioscience (CH867785, CH897212, CH845486, CH898602,  
14 CH878525, CH824520, CH890307, Shandong, China); Insulin (P3376, Beyotime, Shanghai, China),  
15 IL-6 (Cat. 200-06, Proteintech, NJ, USA), EGF (PHG6045, Thermo Fisher Scientific, MA, USA),  
16 MK2206 (HY-10358, MedChemExpress, NJ, USA) were also used in the study. *P120ctn*-specific  
17 siRNAs (#1: sense 5'-gaaugugaugguuuaguuuu-3' and antisense 5'-aacuaaaccaucacauucuu-3'; #2: sense  
18 5'-uagcugaccuccugacuaauu-3' and antisense 5'-uuagucaggaggucagcuauu-3'; #3: sense  
19 5'-ggaccuuacugaaguuuuuu-3' and antisense 5'-aauaacuucaguaagguccuu-3') were synthesized by  
20 Genepharma (Shanghai, China). The quantitative RT-PCR primer sequences for detection of the level  
21 of *CDHI* mRNA were: forward 5'-gaacgcattgccacatacac-3' and reverse 5'-gaattcgggctgtgtgtcat-3'  
22 (Tm=58 °C). The *Alu* RNA was used as the reference (forward 5'-gaggctgaggcaggagaatcg-3' and  
23 reverse 5'-gtcggccaggctggagtg-3', Tm=60°C), as previously described (30).

## 24 Cell transfection

25 X-tremeGENE siRNA Transfection Reagent or X-tremeGENE HP DNA Transfection Reagent (Cat.  
26 04476093001, Cat. 06366236001, Roche, Mannheim, Germany) were used in cell transfection with  
27 siRNAs against *p120ctn* (final concentration, 100 nM) or Kaiso or its mutant expression vectors (2

1  $\mu\text{g}/\text{well}$  in 6 wells plate) following manufacturer's instructions. The efficiency of gene overexpression  
2 or knockdown was determined 48 or 72 hrs post transfection by Western blotting. For stable  
3 transfection, G418 was added into the medium to select consistent GFP-Kaiso expressing MGC803  
4 cells (final concentration, 750  $\mu\text{g}/\text{mL}$ ). Flow sorting assay was performed with a FACS Calibur flow  
5 cytometer (BD Biosciences, Franklin Lakes, US) after 48 hrs cell transfection, then sorted  
6 transfected-SGC7901 cells were grown in 6-well plates under the G418 selection.

### 7 **Wound healing assay**

8 All cells were seeding in 6-well plates (5 wells/treatment). After reaching 95–100% confluence, the  
9 wound healing assays were performed (31). A pipette tip was used to gently scratch the cell monolayer.  
10 After two washes with PBS, the cells were cultured with serum-free RPMI-1640 medium. Images of  
11 wound healing were captured at different times.

### 12 **Transwell assays**

13 Transwell assays (3 wells/treatment) were performed to determine the migration and invasion of cancer  
14 cells (31). For the migration assay, all cells ( $2 \times 10^4$  cells per chamber) were separately resuspended in  
15 180  $\mu\text{L}$  of serum-free RPMI-1640 medium and seeded in the upper chambers (8- $\mu\text{m}$  pores; Corning  
16 Inc., Corning, NY). For the invasion assay, the upper chamber pre-coated with Matrigel (BD  
17 Biosciences, Franklin Lakes, NJ, USA) was used. Then, cells ( $4 \times 10^4$  cells per chamber) were  
18 separately seeding in the upper chambers. After 24 to 48 hrs' incubation, these chambers were fixed  
19 with 4% paraformaldehyde for 30 min and stained with 0.1% crystal violet. Images of migrating and  
20 invading cells were captured using a microscope (Leica DMI4000B, Milton Keynes, Bucks, UK).

### 21 **Cell proliferation assay**

22 Cell counting kit-8 (CCK-8 Kit; C0037, Beyotime, Shanghai, China) was used to detect cell  
23 proliferation (32). Briefly, all cells at the density of  $2 \times 10^3$  cells per well were seeding in 96-well plate.  
24 Cell proliferation was assessed at 0, 24, 48, and 72 hrs by adding 10  $\mu\text{L}$  of CCK-8 solution to each well.  
25 After 2 hrs' incubation with CCK-8, the absorbance at 450 nm was quantified by a microplate reader  
26 (Tecan Infinite M200 PRO, Switzerland). The average value for these wells was calculated for each  
27 treatment and statistically compared with Student t-test.

## 1 **Xenografts in NOD-SCID mice (33)**

2 Cells re-suspended in 0.15 mL PBS ( $1 \times 10^7$  cells/mL) were inoculated subcutaneously into the bilateral  
3 inguinal of 6 week-old female NOD-SCID mice (9 mice/group,  $1 \times 10^6$  cells per injection; purchased  
4 from Beijing Huafukang Biotech). Mice were sacrificed on the 28th inoculation day, and xenografts  
5 were separated, weighted, and photographed.

## 6 **Subcellular fractionation and de-phosphorylation treatment (34, 35)**

7 To prepare cytoplasmic and nuclear extracts, small pieces of tissue or cultured cells at 80% confluence  
8 were homogenized in ice-cold buffer CERI of Nuclear and Cytoplasmic Extraction Reagent (7883,  
9 Thermo Fisher, MA, USA) with CERII and 1 x EDTA-free Protease Inhibitor Cocktail  
10 (REF04693159001, Roche, Mannheim, Germany) according to the Instruction. Samples were then  
11 vortexed, incubated on ice for 20 min, and centrifuged at 14,000 g for 15 min at 4 °C. The supernatants  
12 were recovered to obtain the cytosolic extracts. The pellets were washed sequentially with CERI and  
13 then incubated in buffer NER on ice and vortexed 15 sec every 10 min. After 4 times of vortex,  
14 centrifuging at 14,000 g for 15 min, the extract was collected as nuclear proteins. The purities of  
15 cytoplasmic and nuclear extracts were respectively verified by probing with anti- $\beta$ -TUBULIN and  
16 anti-LAMIN B antibodies.

17 For the calf intestinal alkaline phosphatase (CIAP)-catalyzed de-phosphorylation, the cytoplasmic  
18 and nuclear extracts were aliquoted into two centrifuge microtubes. 1  $\mu$ L of CIAP (p4978, Merck,  
19 Darmstadt, Germany) ( $>10$  U/ $\mu$ L) of protein was added into one aliquot (30  $\mu$ L; ratio of protein  
20 extracts to 10 x CIAP buffer, 27:3) and incubated for 30 min at 37 °C. BSA was used as negative  
21 control in equal amounts of protein extracts in 1 x CIAP buffer.

## 22 **Immunoprecipitation (IP) and Western blotting**

23 Antibodies for Kaiso (sc-365428, Santa Cruz, USA), P120ctn (66208-1, Proteintech, IL, USA),  
24 pan-14-3-3 (sc-629, Santa Cruz), 14-3-3 family ( $\alpha/\beta$ ,  $\epsilon$ ,  $\eta$ ,  $\delta/\gamma$ ,  $\tau$ ,  $\zeta$ ,  $\sigma$ ) kits (#9769, CST, USA), 14-3-3 $\sigma$   
25 (sc-100638, Santa Cruz), Ser/Thr/Tyr phosphor-protein (ab15556, Abcam, UK), phosphorylated AKT  
26 substrate [(R/K)X(R/K)XX(pT/pS)] (pAKT-sub; #9611, Cell Signaling Technology), CDH1 (#3195,  
27 CST), LAMIN B1 (66095-1, Proteintech),  $\beta$ -TUBULIN (66240-1, Proteintech), HA (M20003, Abmart,



1 Shanghai, China), FLAG (66008-2, Proteintech), GFP (NB100-1614, Novus, CO, USA), GST  
2 (66001-1, Proteintech), GAPDH (660004-1, Proteintech) were used in the IP and Western blotting  
3 analyses.

4 After being pre-cleared with protein A/G-coupled Sepharose beads (Cat. 11134515001 and  
5 11243233001, Roche, Mannheim, Germany) for 2 hrs, the nuclear or cytoplasmic lysate was  
6 immunoprecipitated with mouse anti-Kaiso antibody or anti-Phosphoserine/threonine/tyrosine antibody  
7 plus protein A/G Sepharose for 8 hrs at 4 °C. Mouse IgG was used as a negative control. The  
8 precipitates were washed six times with lysis buffer, and boiled in 1 × loading buffer. Protein samples  
9 were resolved by SDS-PAGE, and electroblotted onto nitrocellulose membranes, which were blocked  
10 in 5% skim milk in PBST and probed with antibodies according to the Instruction Manual.

### 11 **Phos-tag SDS-PAGE assay**

12 This is a modified SDS-PAGE method based on the novel Phos-tag (36), which can bind to  
13 phosphorylated proteins and decrease their migration speed. Thus, this assay is often used to  
14 distinguish dephosphorylated proteins from phosphorylated proteins on the case of that a  
15 phosphorylation-specific antibody is not available. 50 μM Phos-tag (final concentration, Phos-tag  
16 Acrylamide AAL-107, WAKO, Japan) and 100 μM MnCl<sub>2</sub> were mixed to prepare SDS-PAGE gel.

### 17 **GST-Pull down (37)**

18 The day after pEBG-GST-Kaiso transfection, MGC803 cells (in 10-cm dishes, eight dishes/group) were  
19 further transfected with pENTER-Flag-14-3-3 members ( $\alpha/\beta$ ,  $\epsilon$ ,  $\eta$ ,  $\delta/\gamma$ ,  $\tau$ ,  $\zeta$ ,  $\sigma$ ) or negative control  
20 vector, respectively. 48 hrs post transfection, MGC803 cells were harvested and used to prepare lysate  
21 with cell lysis buffer with 1× Protease Inhibitor Cocktail (REF04693159001, Roche, Mannheim,  
22 Germany). The lysate was incubated with Glutathione Sepharose beads (20 μL for one group,  
23 17-0756-01, GE healthcare, Sweden) at 4 °C overnight. Beads were washed six times with 500 μL cell  
24 lysis buffer. After the last centrifuging, the supernatant was removed as clean as possible, and the pellet  
25 was suspended in 20 μL 1×SDS sample buffer. Antibodies for GST-Kaiso and Flag-14-3-3 family  
26 proteins were used to detect the pulled down precipitant.

### 27 **Co-immunoprecipitation (Co-IP)**

1 After pre-cleared with protein A/G-coupled Sepharose beads for 2 hrs, the soluble proteins from whole  
2 cell lysate were immunoprecipitated with anti-Kaiso (sc-365428, Santa Cruz) or anti-GFP (ab290,  
3 Abcam) or other antibodies plus protein A/G Sepharose overnight at 4 °C. Mouse IgG or rabbit IgG  
4 was used as a negative control. The precipitates were washed six times with lysis buffer, and boiled  
5 after 1 × SDS loading buffer was added. Protein samples were resolved by SDS-PAGE, and  
6 electroblotted onto nitrocellulose membranes, which were blocked with 5% skim milk in PBST and  
7 probed with the interacted protein antibodies. Loading cell number ratio for Input lane to IP lanes was  
8 1:100.

### 9 **Preparation of pT606-Kaiso-specific antibody**

10 Anti-pT606-Kaiso polyclonal antibodies were raised in rabbits challenged with the synthesized  
11 phosphorylated peptide **LSDRSSpTIPAM**, a sequence corresponding to amino acids 600-610 of  
12 wildtype Kaiso (Kaiso-wt), absorbed with non-phosphorylated peptide **LSDRSSTIPAM**, and enriched  
13 by the phosphorylated peptide **LSDRSSpTIPAM**. Peptide synthesis and immunization of the animals  
14 were done by YouKe (Shanghai, China). The non-phos-peptide was also used to prepare the control  
15 polyclonal antibodies against total Kaiso at the same time. The specificity of pT606-Kaiso and control  
16 antibodies against the corresponding peptide (**LSDRSSpTIPAM** or **LSDRSSTIPAM**) was detected with  
17 ELISA assay.

### 18 **ELISA analyses for polyclonal antibodies against pT606-Kaiso and total Kaiso**

19 Polystyrene plates were coated with 1 µg/mL synthetic phosphorylated peptide **LSDRSSpTIPAM** or  
20 non-phosphorylated peptide **LSDRSSTIPAM** link-coupled by bovine serum albumin (BSA) in 1 × CBS  
21 buffer overnight at 4 °C, respectively, and were washed three times with PBS containing 0.05% Tween  
22 20. Unbinding sites were blocked with 5% milk at room temperature for 2 hrs. The purified antibodies  
23 were added (100 µL/well) and incubated at 37 °C for 1 hr. After being washed with 0.05% Tween/PBS,  
24 plates were added HRP-labeled goat anti-Rabbit IgG (100 µL/well) and incubated at room temperature  
25 for 30 min. Peroxidase activity was measured with 0.15 mg/mL TMB substrate solution (100 µL/well).  
26 After 15 min at room temperature, the reaction was stopped by 2M H<sub>2</sub>SO<sub>4</sub> (50 µL/well). Optical  
27 density absorbance (OD) at 450 nm was determined using a model 550 microplate reader.

## 1 **Immunohistochemical staining (IHC)**

2 Rabbit pT606-Kaiso polyclonal antibody (1:100) and mouse monoclonal antibody for total Kaiso (1:50,  
3 sc-23871, Santa Cruz) were used in the IHC analysis. The REAL™ EnVision™ Detection system  
4 including anti-rabbit/mouse IgG secondary antibodies and peroxidase/diaminobenzidine (Dako, Agilent  
5 Technologies) was used to visualize the primary antibody-binding cells according to the manufacturer's  
6 protocol. Briefly, paraffin sections (4 μm) were dewaxed and rehydrated in xylene and ethanol. For  
7 antigen retrieval these sections were autoclaved for 3 min in 10 mM sodium citrate buffer containing  
8 0.05% Tween-20 (pH 6.0) for pT606-Kaiso and in 1 mM EDTA buffer (pH 8.0) for total Kaiso. Then,  
9 these sections were immersed in 3% H<sub>2</sub>O<sub>2</sub> for 10 min to block endogenous peroxidase. Following  
10 submerging in 5% bovine serum albumin (BSA) (cat. no. A1933; Sigma Life Science; Merck KGaA)  
11 for 60 min, the sections were incubated with the primary antibody overnight at 4 °C. The PBS washed  
12 sections were then treated with the REAL™ EnVision™ Detection system and counterstained with  
13 hematoxylin (0.125%; ZhongShan Jinqiao Biotechnology) at room temperature for 1 min. Normal  
14 rabbit IgG and normal mouse IgG (cat. no. ZDR 5003 and cat. no. ZDR 5006; ZhongShan Jinqiao  
15 Biotechnology) were used as negative controls. The former was diluted and incubated as for the  
16 pT606-Kaiso antibody, and the latter was diluted and incubated as for total Kaiso antibody).

## 17 **Confocal analysis**

18 For mCherry-14-3-3, direct fluorescence was detected with laser confocal microscope assay. MGC803  
19 cells with mCherry-14-3-3 overexpression were rinsed for three times with PBS, fixed with 1%  
20 paraformaldehyde in PBS 30 min at 37 °C, punched with 0.5% triton X-100 for 10 min at 37 °C,  
21 incubated with respective primary and secondary antibodies, washed for three times in PBS,  
22 counterstained with DAPI (1 μg/mL) for 5 min, and then examined with Leica SP5 Laser Scanning  
23 Confocal Microscopy. The antibodies for pT606-Kaiso (1 μg/μL, 1:100), for total Kaiso (commercial  
24 antibody (0.2 μg/μL, 1:20, sc-365428, Santa Cruz), and for P120ctn (1:100, 66208-1, Proteintech) were  
25 used as the primary antibodies; the FITC-labeled antibody against rabbit IgG (1:100, ab6717, Abcam)  
26 and CY5-labeled antibody against mouse IgG (1:100, Cat. No. 072-02-18-06, KPL Gaithersburg, MD,  
27 USA) were used as secondary antibodies for observation under Leica SP5 Laser Scanning Confocal  
28 Microscope and were analyzed with ImageXpress Micro high content screening System.

1 For the detection of Kaiso in tissues, fresh cryostat sections (4  $\mu\text{m}$ ) from gastric carcinoma and the  
2 paired normal tissues were fixed with 4% paraformaldehyde for 10 min at 37  $^{\circ}\text{C}$  and treated with 0.5%  
3 triton X-100 for 10 min at 37  $^{\circ}\text{C}$ , and then incubated with respective primary, secondary antibodies,  
4 DAPI, and then examined as described above.

### 5 **Publicly available RNA-Seq, cDNA array, and other datasets**

6 The RNA sequencing datasets in Cancer Cell Line Encyclopeida (CCLE) and Genotype-Tissue  
7 Expression (GTEx) projects were downloaded from official websites ([portals.broadinstitute.org/ccle](http://portals.broadinstitute.org/ccle)  
8 and [www.gtexportal.org](http://www.gtexportal.org)) (38-40). All raw data were transferred to Transcripts per kilobase of exon  
9 model per Million mapped reads (TPM) using uniform names for each protein-coding gene in the  
10 human genome. The Pearson correlation coefficient ( $r$ ) of genes expression was calculated by R  
11 statistical software (version 3.6.1) with a set of procedures (41). Briefly, raw data was read through  
12 "read.table()" function, and an array was established to store data by "array()" function. Then the  
13 Pearson correlation coefficient was calculated by "cor()" function, and finally saving the data to files in  
14 csv format by the function of "write.table()".

## 15 **RESULTS**

### 16 **Discovery of phosphorylation of Kaiso in the cytoplasm**

17 Transcription repressor Kaiso is also a cytoplasmic protein. The regulatory mechanism of Kaiso  
18 compartmentalization is still unknown. Previous study showed there might be putative phosphorylation  
19 sites within Kaiso in proteomic mass spectrometry analysis (Fig. S1) (42-44). We wondered if the  
20 putative phosphorylation affected Kaiso compartmentalization. In Phos-tag SDS-PAGE analyses, a  
21 Phos-tag could bind specifically to a phosphate group in proteins via metal ions, such as  $\text{Zn}^{2+}$  or  $\text{Mn}^{2+}$ ,  
22 which could be used to separate phosphorylated proteins from non-phosphorylated proteins (36). Thus,  
23 the Phos-tag assay was preliminarily utilized to analyze the phosphorylation status of Kaiso in human  
24 cells. We found that while the cytoplasmic and nuclear Kaiso from GFP-Kaiso stably transfected  
25 MGC803 cells migrated at the same speed in regular SDS-PAGE gel, the cytoplasmic Kaiso migrated  
26 much slower than the nuclear Kaiso in the Phos-tag gel, whether these cells were cultured *in vitro* or

1 transplanted into nude mice as a xenograft, and no phosphorylated Kaiso was detected with the CIAP  
2 de-phosphorylation (Fig. 1A).

3 To validate the different phosphorylation states of Kaiso in the cytoplasm and nucleus, an  
4 anti-phosphoserine/threonine/tyrosine universal antibody was then used to precipitate global  
5 phosphorylated proteins and a Kaiso-specific antibody was used to visualize the possible  
6 phosphorylated Kaiso (Fig. 1B). Again, phosphorylated Kaiso was observed only in the cytoplasmic  
7 precipitates, but not in the nuclear counterpart, suggesting that there may be phosphorylation of Kaiso  
8 in the cytoplasm. Thus, Kaiso phosphorylation kinase and target site were characterized in details as  
9 described below.

### 10 **Kaiso is phosphorylated at T606 by AKT1 kinase**

11 Human Kaiso contains a conservative RSSTIP motif with the threonine-606 (T606) residue (Fig. 2A).  
12 Protein kinase B AKT1 is a typical kinase for the (RX)RXXpS/pT motif in multiple proteins such as  
13 mTOR, GSK-3 $\beta$ , AMPKA, Catenin- $\beta$ 1 (45-48). We wondered that the RSSTIP motif within Kaiso  
14 might be one of AKT1 targets. To verify if Kaiso T606 could be a true phosphorylation site for the  
15 kinase AKT1, we stimulated the activity of AKT signaling of MGC803 cells with insulin, IL-6, and  
16 FBS after overnight starvation (49). As expected, the phosphorylation level of endogenous Kaiso was  
17 markedly increased in MGC803 cells stimulated with insulin, IL-6, and FBS, but not with EGF (Fig.  
18 2B).

19 Using the immunoprecipitation assay employing a phospho-(Ser/Thr) AKT substrate (pAKT-sub)  
20 -specific antibody, endogenous Kaiso signal could also be detected in the immunoprecipitated  
21 pAKT-sub protein complexes, and vice versa (Fig. S3A). The amounts of both global pAKT-sub and  
22 Kaiso-antibody-immunoprecipitated pAKT-sub were also significantly increased by insulin stimulation  
23 and reversed by AKT inhibitor MK2206 treatment (Fig. 2C). A similar effect was also observed in  
24 MGC803 cells with *AKT1* overexpression (Fig. 2D).

25 Then, a pT606-Kaiso-specific polyclonal antibody was prepared from rabbit using the  
26 phos-peptide LSDRSSpTIPAM as antigen (Fig. S2) and used to directly detect phosphorylated Kaiso.  
27 The activity of AKT1 to phosphorylate Kaiso at T606 was much higher than other two AGC kinases  
28 S6K and SGK (Fig. 2E). As expected, the amount of pT606-Kaiso was significantly increased in

1 MGC803 and BGC823 cells with *AKT1* overexpression (Fig. 2F). Together, these results indicate that  
2 Kaiso can be phosphorylated at T606 by AKT1.

3 To confirm effect of the T606 phosphorylation on Kaiso compartmentalization, we further checked  
4 the phosphorylation status of endogenous Kaiso in the nucleus and cytoplasm using the pT606-Kaiso  
5 specific antibody. In consistent with the results described above, most pT606-Kaiso was detected in the  
6 cytoplasm of 3 human cancer cell lines (MGC803, BGC823, and RKO) and the CIAP  
7 de-phosphorylation treatment markedly decreased the amount of pT606-Kaiso in the cytoplasm in  
8 Western blotting (Fig. 1C). The confocal microscopy results further confirmed the cytoplasmic  
9 compartmentalization of pT606-Kaiso in MGC803 cells (Fig. 1D). Similarly, pT606-Kaiso was only  
10 detected in the cytoplasm in the IHC and confocal microscopy analyses while total Kaiso was mainly  
11 detected in the nucleus of human gastric mucosal tissues (Fig. 1E and 1F). Collectively, the above  
12 results demonstrate that AKT1 can phosphorylate Kaiso at T606 and pT606-Kaiso mainly locate in the  
13 cytoplasm of human cells.

#### 14 **pT606-Kaiso interacted with 14-3-3 family members**

15 It is well known that RSXpSXP is a 14-3-3 phosphoserine binding consensus motif (50). To study  
16 whether the Kaiso RSSpTIP is a 14-3-3 binding motif, we performed GST-pull down and Co-IP  
17 experiments. The results of GST-pull down assay showed that GST-Kaiso could strongly pull down  
18 14-3-3 $\sigma$  (SFN), moderately pull down 14-3-3 $\epsilon$ , 14-3-3 $\gamma$ , 14-3-3 $\zeta$ , and weakly pull down 14-3-3 $\eta$  in  
19 MGC803 cells lysate (Fig. 3A). The Co-IP results confirmed that endogenous Kaiso could bind to  
20 endogenous pan-14-3-3 or 14-3-3 $\sigma$  protein in MGC803 cells (Fig. 3B). As expected, the T606A  
21 mutation abolished most Kaiso-14-3-3 interaction (Fig. 3C), suggesting that the phosphorylation site  
22 T606 within the RSSpTIP motif may play a main role in determining the Kaiso–14-3-3 interaction. In  
23 addition, AKT1 overexpression increased the Kaiso–14-3-3 interaction (Fig. S3B). These data indicate  
24 that Kaiso could interact with 14-3-3 family proteins in a T606 phosphorylation-dependent manner.

#### 25 **Increased cytoplasmic accumulation of pT606-Kaiso by the 14-3-3 $\sigma$ interaction**

26 Intracellular Kaiso compartmentalization is affected by growth conditions (13, 17). Our indirect  
27 immunofluorescence confocal microscope analyses showed that 81% endogenous Kaiso was observed



1 in the nucleus of MGC803 cells (Fig.4A-B). Notably, enforced mCherry-14-3-3 $\gamma$  or -14-3-3 $\sigma$   
2 overexpression significantly increased the proportion of endogenous Kaiso in the cytoplasm, compared  
3 to the mCherry control vector (from 19% to 37% or 36%) and Kaiso was mainly co-localized with  
4 mCherry-14-3-3 $\gamma$  or -14-3-3 $\sigma$  in the cytoplasm of these cells in the confocal analysis. Western blotting  
5 confirmed that mCherry-14-3-3 $\sigma$  overexpression increased the cytoplasmic accumulation of  
6 endogenous Kaiso (Fig. 4C, red arrowed) while it decreased the nucleic Kaiso (Fig. 4C, green arrowed).  
7 In addition, 14-3-3 $\sigma$  only promoted the cytoplasmic accumulation of wildtype Kaiso (Kaiso-wt), but  
8 not the T606A mutant (Fig. 4D, red arrowed), implying an increase of pT606-Kaiso in the cytoplasm  
9 by 14-3-3 $\sigma$  and likes. 14-3-3 $\sigma$  or 14-3-3 $\gamma$  overexpression also induced more cytoplasmic pT606-Kaiso  
10 in MGC803 and BGC823 cell lines in Western blotting (Fig. S3C-D). These results solidly confirm that  
11 the pT606-Kaiso can interact with 14-3-3 and in turn accumulate in the cytoplasm of human cancer  
12 cells.

### 13 **The P120ctn interaction is essential for pT606-Kaiso-14-3-3 accumulation in the cytoplasm**

14 As a given Kaiso interacting protein, the P120ctn binding is essential for the trafficking of Kaiso from  
15 the nucleus to the cytoplasm (18, 19). Thus, we further studied whether 14-3-3 bound to the  
16 pT606-Kaiso–P120ctn complex or individual pT606-Kaiso molecule in the cytoplasm. Interestingly,  
17 we found that 14-3-3 $\sigma$  overexpression markedly increased the amount of P120ctn in the anti-Kaiso  
18 antibody precipitated complexes, while the levels of total endogenous Kaiso and P120ctn proteins were  
19 not changed in MGC803 cells (Fig. 5A). Further analysis showed that more Kaiso-P120ctn binding was  
20 detected in the cytoplasm, but not in the nucleus of MGC803 cells with 14-3-3 $\sigma$  overexpression (Fig.  
21 5B). Immunofluorescence confocal microscopy showed that P120ctn, Kaiso, and 14-3-3 $\sigma$  were mainly  
22 co-localized in the cytoplasm (Fig. 5C). Moreover, when P120ctn was knocked down by siRNA  
23 (siP120ctn), the cytoplasmic Kaiso accumulation promoted by 14-3-3 $\sigma$  disappeared in the MGC 803  
24 cells (Fig. 5D) while the level of total Kaiso was not changed (Fig. 5E). These results suggest that the  
25 P120ctn interaction is essential for the pT606-Kaiso–14-3-3 $\sigma$  accumulation in the cytoplasm.

### 26 **De-repression of Kaiso target genes by T606 phosphorylation**

27 It was reported that Kaiso could bind to both methylated and non-methylated Kaiso binding sequences

1 in target gene promoters and suppress their transcription (11). We wondered whether T606  
2 phosphorylation of Kaiso and its bindings with 14-3-3/P120ctn proteins could affect expression of  
3 Kaiso target genes through the cytoplasmic accumulation. Through re-analyzing the RNA-seq datasets  
4 for 14-3-3 family members and Kaiso target genes (including *CDHI*, *CCND1*, *CCNE1*, *MTA2*, *DLL1*,  
5 and *DAG1*) from GTEx and CCLE (38-40), we found that the level of 14-3-3 $\sigma$  mRNA was positively  
6 and most significantly correlated with that of *CDHI* in both normal human tissues ( $n=11688$ ,  $r=0.60$ ,  
7  $P<0.001$  in Pearson correlation analysis) in GTEx datasets and cancer cell lines in CCLE datasets  
8 ( $n=1156$ ,  $r=0.41$ ,  $P<0.001$ ) (Fig. 6A and Fig. S4A). This is consistent with the phenomenon that  
9 14-3-3 $\sigma$  could strongly bind to Kaiso described above (Fig.3A), suggesting an exact effect of 14-3-3 $\sigma$   
10 expression on regulation of *CDHI* transcription, probably through the pT606-Kaiso-14-3-3 $\sigma$   
11 interaction. Interestingly, association between the levels of *CDHI* and *Kaiso* mRNA was only observed  
12 in human normal tissue samples from subjects ( $n=570$ ) in the GTEx and most normal tissue samples  
13 patients ( $n=697$ ) in the Cancer Genome Atlas (TCGA) datasets, but not in cancer cell lines ( $n=1063$ ) in  
14 the CCLE datasets nor in cancer tissues of many organs in the TCGA datasets (Fig. S4B and S4C),  
15 suggesting that endogenous Kaiso may be not a repressor for *CDHI* transcription in normal cells via  
16 the translocation of phosphorylated Kaiso from the nucleus to the cytoplasm, and may be a repressor  
17 for *CDHI* transcription in cancer cells because of blocks of the nucleus-cytoplasm shift by the  
18 decreased level of Kaiso phosphorylation as described below.

19 Because we did not detected *CDHI* expression in MGC803 and BGC823 cells, therefore, two  
20 gastric cancer cell lines SGC7901 and MKN45 with active *CDHI* expression were used to study effects  
21 of Kaiso and 14-3-3 $\sigma$  expression changes on the function of Kaiso as a transcription repressor. As  
22 expectedly, Kaiso overexpression alone indeed decreased the amount of CDH1 whereas 14-3-3 $\sigma$   
23 co-overexpression could abolish Kaiso-induced *CDHI* repression in SGC7901 and MKN45 cells in  
24 Western blotting (Fig. 6B). These results were confirmed in qRT-PCR analyses (Fig. 6C). A similar  
25 relationship was observed in gastric carcinoma tissues. While the level of pT606-Kaiso was decreased  
26 in most gastric cancer samples, the ratios of pT606-Kaiso to total Kaiso was positively and  
27 significantly associated with the amounts of CDH1 (adjusted by GAPDH) among gastric cancer and the  
28 paired normal tissue samples from 12 patients (Fig. 6D and 6E). Similar correlation was also detected



1 between the levels of CDH1 and 14-3-3 $\sigma$ . Taken together, the above results indicate that  
2 pT606-Kaiso-14-3-3 $\sigma$  binding in the cytoplasm can deprive the function of Kaiso as a transcription  
3 repressor and lead to de-repression of the transcription of Kaiso target gene *CDH1*.

#### 4 **Enhancement of the growth of cancer cells by depriving pT606 phosphorylation of Kaiso**

5 To evaluate the impact of pT606 phosphorylation of Kaiso on biological behaviors of cancer cells, we  
6 performed a set of functional assays through overexpression of wildtype Kaiso or its T606A mutant  
7 that cannot be phosphorylated. The results of both wound healing and transwell tests showed that the  
8 migration of SGC7901 and MKN45 gastric cancer cells was mostly increased by transient transfection  
9 of Kaiso T606A mutant while it was only weakly increased by the transfection of wildtype Kaiso (Fig.  
10 8A and 8B). Similar differences were also observed in the invasion test (Fig. 8C). Although difference  
11 was not observed in the proliferation of cells (data not shown), however, the animal experiments  
12 showed that the average weight of xenografts derived from SGC7901 cells stably transfected with  
13 Kaiso-T606A mutant was significantly higher than that of cells transfected with empty vector control in  
14 NOD-SCID mice (Fig. 8D,  $p < 0.05$  in the paired t-test). All these results showed that Kaiso T606A  
15 mutant significantly increased the migration and invasion of cancer cells *in vitro* as well as boosted the  
16 growth of cancer cells *in vivo* compared to Kaiso T606 wildtype.

#### 17 **Discussions**

18 The subcellular locations of Kaiso determine its roles in normal cell differentiation and cancer  
19 development. However, detailed regulation machinery for the compartmentalization of Kaiso is far  
20 from clear. In this study we demonstrated, for the first time, that Kaiso could be phosphorylated at  
21 T606 by AKT1, the pT606-Kaiso could interact with 14-3-3 and P120ctn in the cytoplasm and promote  
22 the shift of Kaiso from the nucleus to the cytoplasm. The phosphorylation of Kaiso finally leads to  
23 deprivation of Kaiso as a transcription repressor and de-repression of Kaiso target gene *CDH1* in  
24 normal tissues. Depletion of the T606 phosphorylation of Kaiso could augment repression of *CDH1*  
25 expression and promote the growth of cancer cells *in vivo*.

26 It's well known that 14-3-3 family proteins bind to common phosphoserine/phosphothreonine  
27 -containing peptide motifs corresponding to Mode-1 (RSXpSXP) or Mode-2 (RXY/FXpSXP)

1 sequences (46). We found that Kaiso contains a very conservative RSSTIP motif that could be  
2 phosphorylated by AKT1 in both *in vivo* and cell-free system at RSSTIP-T606 site. This is consistent  
3 with the report that T606 is one of phosphorylation sites of Kaiso in mass spectrometry analysis (42).  
4 That pT606-Kaiso could directly bind 14-3-3 family proteins, and the T606A mutation could abolish  
5 most Kaiso-14-3-3 binding indicate the T606 phosphorylation is essential for Kaiso-14-3-3 binding.

6 It has been reported that a region consisting of N-terminal amino acid residues (454 - 672aa) of  
7 Kaiso directly interacts with P120ctn (1) and Kaiso-P120ctn interaction promotes cytoplasmic-nuclear  
8 trafficking of Kaiso (18, 19). The phosphorylation site T606 is located within the P120ctn binding site,  
9 suggesting an effect of the phosphorylation at T606 on Kaiso-P120ctn interaction. In addition, P120ctn  
10 could bind to CDH1 and modulate its function and stability (51) and WNT-stimulated P120ctn  
11 phosphorylation could promote P120ctn releasing from the CDH1-P120ctn complexes, enhances  
12 Kaiso-P120ctn interaction (52). It is well known that most 14-3-3 $\sigma$  proteins localize in the cytoplasm  
13 (53) while Kaiso mainly localizes in the nucleus (54). Here, we observed that pT606-Kaiso, 14-3-3,  
14 and P120ctn proteins could co-localize in the cytoplasm and siRNA-knockdown of *P120ctn* abolished  
15 the 14-3-3-induced cytoplasmic Kaiso-14-3-3 binding. These results demonstrate that Kaiso-14-3-3 $\sigma$   
16 interaction may be dependent on the Kaiso-P120ctn binding and that Kaiso, 14-3-3 $\sigma$ , and P120ctn may  
17 form a triplex in the cytoplasm. It was reported that cytoplasm Kaiso functionally linked the  
18 autophagy-related protein LC3A/B in breast cancer cells (55). How Kaiso, 14-3-3 $\sigma$ , and P120ctn  
19 interacting with each other is worth further studying.

20 Human *Kaiso/ZBTB33* gene locates in chromosome X, which is frequently amplified in the  
21 genome of many cancers. It is controversy on Kaiso's roles in cancer development. In the absence of  
22 the tumor suppressor *APC*, *Kaiso*-deficient mice were resistant to intestinal cancer, suggesting that  
23 *Kaiso* might be an oncogene (15). On the contrary, Kaiso has also been suggested to be a potential  
24 tumor suppressor, which repressed the transcription of *MMP7*, *CCND1*, and *WNT11* genes involved in  
25 oncogenesis and metastasis (7, 9, 56). Functions of Kaiso are tightly related and significantly  
26 influenced by microenvironmental factors (17). We found here that increase of the level of  
27 pT606-Kaiso or pan-14-3-3 (especially 14-3-3 $\sigma$ ) expression could lead to Kaiso accumulation in the  
28 cytoplasm, deprive transcriptional function of Kaiso, and de-repression of Kaiso target gene *CDH1*.

1 Kaiso phosphorylation may account for the positive correlation between the levels of *ZBTB33/Kaiso*  
2 and *CDH1* mRNAs in human normal tissues. In contrast, the decreased level or deprivation of pT606  
3 phosphorylation of Kaiso could block the cytoplasmic transportation of Kaiso, repress *CDH1*  
4 transcription, and promote the growth of cancer cells. Our results are consistent with the report that  
5 overexpression of *Kaiso/Zbtb33* resulted in downregulation of *Cdh1* in mice intestinal tissues (57).  
6 These phenomena indicate that Kaiso phosphorylation may be a crucial determinant for functions of  
7 Kaiso in cancer development through de-repression of tumor related genes.

8 In conclusion, Kaiso can be phosphorylated by AKT1 at T606 within the very conservative motif  
9 RSSTIP in the cytoplasm. pT606-Kaiso can directly interact with 14-3-3 and P120ctn proteins and  
10 accumulate in the cytoplasm that consequently leads loss of functions of Kaiso as a transcription and  
11 cancer repressor. The decreased level of phosphorylation of Kaiso may contribute to cancer  
12 development through downregulation of *CDH1* expression in the stomach.

### 13 **Acknowledgements**

14 We gratefully acknowledge the critical reading of the manuscript and kindly sending AGC kinase  
15 plasmids by Dr. Jian-Ping Guo in Sun Yat-Sen University. This work is supported by National Natural  
16 Science Foundation of China (81402343).

### 17 **Competing Interest**

18 The authors declare that they have no conflict of interest.

### 19 **Author contribution**

20 D. Deng, W. Tian and S. Qin. designed research; W. Tian, H. Yuan, S. Qin, and B. Zhang performed  
21 research; D. Deng, W. Tian, H. Yuan, L. Gu and J. Zhou analyzed data; D. Deng, W. Tian and S. Qin  
22 wrote the paper.

### 23 **References**

24 1. Daniel JM, Reynolds AB. (1999) The catenin p120(ctn) interacts with Kaiso, a novel BTB/POZ  
25 domain zinc finger transcription factor. *Mol Cell Biol* 19: 3614-3623.

- 1 2. Prokhortchouk A, Hendrich B, Jørgensen H, Ruzov A, Wilm M, Georgiev G, *et al.* (2001) The  
2 p120 catenin partner Kaiso is a DNA methylation-dependent transcriptional repressor. *Genes Dev*  
3 15: 1613-1618.
- 4 3. Daniel JM, Spring CM, Crawford HC, Reynolds AB, Baig A. (2002) The p120(ctn)-binding  
5 partner Kaiso is a bi-modal DNA-binding protein that recognizes both a sequence-specific  
6 consensus and methylated CpG dinucleotides. *Nucleic Acids Res* 30: 2911-2919.
- 7 4. Yoon HG, Chan DW, Reynolds AB, Qin J, Wong J. (2003) N-CoR mediates DNA  
8 methylation-dependent repression through a methyl CpG binding protein Kaiso. *Mol Cell* 12:  
9 723-734.
- 10 5. Rodova M, Kelly KF, VanSaun M, Daniel JM, Werle MJ. (2004) Regulation of the rapsyn  
11 promoter by kaiso and delta-catenin. *Mol Cell Biol* 24: 7188-7196.
- 12 6. Blattler A, Yao L, Wang Y, Ye Z, Jin VX, Farnham PJ. (2013) ZBTB33 binds unmethylated  
13 regions of the genome associated with actively expressed genes. *Epigenetics Chromatin* 6: 13.
- 14 7. Pozner A, Terooatea TW, Buck-Koehntop BA. (2016) Cell-specific Kaiso (ZBTB33) Regulation  
15 of Cell Cycle through Cyclin D1 and Cyclin E1. *J Biol Chem* 291: 24538-24550.
- 16 8. Robinson SC, Klobucar K, Pierre CC, Ansari A, Zhenilo S, Prokhortchouk E, *et al.* (2017) Kaiso  
17 differentially regulates components of the Notch signaling pathway in intestinal cells. *Cell*  
18 *Commun Signal* 15: 24.
- 19 9. Ogden SR, Wroblewski LE, Weydig C, Romero-Gallo J, O'Brien DP, Israel DA, *et al.* (2008)  
20 p120 and Kaiso regulate Helicobacter pylori-induced expression of matrix metalloproteinase-7.  
21 *Mol Biol Cell* 19: 4110-4121.
- 22 10. Dai SD, Wang Y, Zhang JY, Zhang D, Zhang PX, Jiang GY, *et al.* (2011) Upregulation of  
23  $\delta$ -catenin is associated with poor prognosis and enhances transcriptional activity through Kaiso in  
24 non-small-cell lung cancer. *Cancer Sci* 102: 95-103.
- 25 11. Buck-Koehntop BA, Stanfield RL, Ekiert DC, Martinez-Yamout MA, Dyson HJ, Wilson IA, *et al.*  
26 (2012) Molecular basis for recognition of methylated and specific DNA sequences by the zinc  
27 finger protein Kaiso. *Proc Natl Acad Sci U S A* 109: 15229-15234.

- 1 12. Lopes EC, Valls E, Figueroa ME, Mazur A, Meng FG, Chiosis G, Laird PW, Schreiber-Agus N,  
2 Greally JM, Prokhortchouk E, Melnick A. (2008) Kaiso contributes to DNA  
3 methylation-dependent silencing of tumor suppressor genes in colon cancer cell lines. *Cancer Res*  
4 68: 7258-7263.
- 5 13. Jones J, Wang H, Zhou J, Hardy S, Turner T, Austin D, *et al.* (2012) Nuclear Kaiso indicates  
6 aggressive prostate cancers and promotes migration and invasiveness of prostate cancer cells. *Am*  
7 *J Pathol* 181: 1836-1846.
- 8 14. Jones J, Wang H, Karanam B, Theodore S, Dean-Colomb W, Welch DR, *et al.* (2014) Nuclear  
9 localization of Kaiso promotes the poorly differentiated phenotype and EMT in infiltrating ductal  
10 carcinomas. *Clin Exp Metastasis* 31: 497-510.
- 11 15. Prokhortchouk A, Sansom O, Selfridge J, Caballero IM, Salozhin S, Aithozhina D, *et al.* (2006)  
12 Kaiso-deficient mice show resistance to intestinal cancer. *Mol Cell Biol* 26: 199-208.
- 13 16. Iioka H, Doerner SK, Tamai K. (2009) Kaiso is a bimodal modulator for Wnt/beta-catenin  
14 signaling. *FEBS Lett* 583: 627-632.
- 15 17. Soubry A, van Hengel J, Parthoens E, Colpaert C, Van Marck E, Waltregny D, *et al.* (2005)  
16 Expression and nuclear location of the transcriptional repressor Kaiso is regulated by the tumor  
17 microenvironment. *Cancer Res* 65: 2224-2233.
- 18 18. Zhang PX, Wang Y, Liu Y, Jiang GY, Li QC, Wang EH. (2011) p120-catenin isoform 3 regulates  
19 subcellular localization of Kaiso and promotes invasion in lung cancer cells via a  
20 phosphorylation-dependent mechanism. *Int J Oncol* 38: 1625-1635.
- 21 19. Zhang L, Gallup M, Zlock L, Feeling Chen YT, Finkbeiner WE, McNamara NA. (2016) Cigarette  
22 Smoke Mediates Nuclear to Cytoplasmic Trafficking of Transcriptional Inhibitor Kaiso through  
23 MUC1 and P120-Catenin. *Am J Pathol* 186: 3146-3159.
- 24 20. Moore, B. W. and Perez, V. J. (1967) Specific Acid Proteins in the Nervous System. *Physiological*  
25 *and Biochemical Aspects of Nervous Integration*. p343–359. New Jersey: Prentice-Hall.  
26 Englewood Cliffs.
- 27 21. Dougherty MK, Morrison DK. (2004) Unlocking the code of 14-3-3. *J Cell Sci* 117: 1875-1884.

- 1 22. Coblitz B, Wu M, Shikano S, Li M. (2006) C-terminal binding: an expanded repertoire and  
2 function of 14-3-3 proteins. *FEBS Lett* 580: 1531-1535.
- 3 23. Mori M, Vignaroli G, Botta M. (2013) Small molecules modulation of 14-3-3 protein-protein  
4 interactions. *Drug Discov Today Technol* 10: e541-547.
- 5 24. Wilker EW, Grant RA, Artim SC, Yaffe MB. (2005) A structural basis for 14-3-3 sigma  
6 functional specificity. *J Biol Chem* 280: 18891-18898.
- 7 25. Mackintosh C. (2004) Dynamic interactions between 14-3-3 proteins and phosphoproteins  
8 regulate diverse cellular processes. *Biochem J* 381: 329-342.
- 9 26. Mühlmann G, Ofner D, Zitt M, Müller HM, Maier H, Moser P, *et al.* (2010) 14-3-3 sigma and p53  
10 expression in gastric cancer and its clinical applications. *Dis Markers* 29: 21-29.
- 11 27. Ko S, Kim JY, Jeong J, Lee JE, Yang WI, Jung WH. (2014) The role and regulatory mechanism of  
12 14-3-3 sigma in human breast cancer. *J Breast Cancer* 17: 207-218.
- 13 28. Radhakrishnan VM, Putnam CW, Martinez JD. (2012) Activation of phosphatidylinositol 3-kinase  
14 (PI3K) and mitogen-activated protein kinase (MAPK) signaling and the consequent induction of  
15 transformation by overexpressed 14-3-3 $\gamma$  protein require specific amino acids within 14-3-3 $\gamma$   
16 N-terminal variable region II. *J Biol Chem* 287: 43300-43311.
- 17 29. Radhakrishnan VM, Martinez JD. (2010) 14-3-3gamma induces oncogenic transformation by  
18 stimulating MAP kinase and PI3K signaling. *PLoS One* 5: e11433.
- 19 30. Marullo M, Zuccato C, Mariotti C, Lahiri N, Tabrizi SJ, Donato SD, *et al.* (2010). Expressed Alu  
20 repeats as a novel, reliable tool for normalization of real-timequantitative RT-PCR data. *Genome*  
21 *Biology* 11: R9.
- 22 31. Zhang BZ, Xiang SY, Zhong QM, Yin YR, Gu LK, Deng DJ. (2012) The p16-Specific  
23 Reactivation and Inhibition of Cell Migration Through Demethylation of CpG Islands by  
24 Engineered Transcription Factors. *Human Gene Therapy* 23: 1071-1081.
- 25 32. Ma WR, Qiao JL, Zhou J, Gu LK, Deng DJ. (2020) Characterization of Novel LncRNA P14AS as  
26 a Protector of ANRIL through AUF1 Binding in Human Cells. *Mol Cancer* 19: 42.

- 1 33. Cui CH, Gan Y, Gu LK, Wilson J, Liu ZJ, Zhang BZ, et al. (2015) P16-specific DNA methylation  
2 by engineered zinc finger methyltransferase inactivates gene transcription and promotes cancer  
3 metastasis. *Genome Biology* 16: 252.
- 4 34. Samaddar S, Dutta A, Sinharoy S, Paul A, Bhattacharya A, Saha S, et al. (2013)  
5 Autophosphorylation of gatekeeper tyrosine by symbiosis receptor kinase. *FEBS Lett* 587:  
6 2972-2979.
- 7 35. Lynes M, Narisawa S, Millán JL, Widmaier EP. (2011) Interactions between CD36 and global  
8 intestinal alkaline phosphatase in mouse small intestine and effects of high-fat diet. *Am J Physiol*  
9 *Regul Integr Comp Physiol* 301: R1738-1747.
- 10 36. Kinoshita E, Kinoshita-Kikuta E, Koike T. (2009) Separation and detection of large  
11 phosphoproteins using Phos-tag SDS-PAGE. *Nat Protoc* 4: 1513-1521.
- 12 37. Margret B E, Elena N P, Jason R O. (2007) GST Pull-down. *CSH Protoc*. 2007:pdb.prot4757.
- 13 38. Lonsdale J, Thomas J, Salvatore M, Phillips R, Lo E, Shad S, et al. (2013) The genotype-tissue  
14 expression (GTEx) project. *Nat Genet* 45: 580-585.
- 15 39. Ghandi M, Huang FW, Jane-Valbuena J, Kryukov GV, Lo CC, McDonald ER, et al. (2019)  
16 Next-generation characterization of the Cancer Cell Line Encyclopedia. *Nature* 569: 503-508.
- 17 40. Melé M, Ferreira PG, Reverter F, DeLuca DS, Monlong J, Sammeth M, et al. (2015) Human  
18 genomics. The human transcriptome across tissues and individuals. *Science* 348: 660-665.
- 19 41. Liu WS, Tian W, Zhou J, Gu LK, Deng DJ. (2020) The RNA transcriptome database was used to  
20 mine the candidate transcription factors of EZH2 gene in tumor cells. *Chinese J Biochem Mol Biol*  
21 36: 665-673.
- 22 42. Rush J, Moritz A, Lee KA, Guo A, Goss VL, Spek EJ, et al. (2005) Immunoaffinity profiling of  
23 tyrosine phosphorylation in cancer cells. *Nat Biotechnol* 23: 94-101.
- 24 43. Hornbeck PV, Zhang B, Murray B, Kornhauser JM, Latham V, Skrzypek E. (2015)  
25 PhosphoSitePlus, 2014: mutations, PTMs and recalibrations. *Nucleic Acids Res*. 43: D512-520.
- 26 44. Jumper, J et al. Highly accurate protein structure prediction with AlphaFold. *Nature* Nature. 2021  
27 Aug;596(7873):583-589. doi: 10.1038/s41586-021-03819-2. PMID: 34265844



- 1 45. Navé BT, Ouwens M, Withers DJ, Alessi DR, Shepherd PR. (1999) Mammalian target of  
2 rapamycin is a direct target for protein kinase B: identification of a convergence point for  
3 opposing effects of insulin and amino-acid deficiency on protein translation. *Biochem J* 344(Pt 2):  
4 427-431.
- 5 46. Salas TR, Reddy SA, Clifford JL, Davis RJ, Kikuchi A, Lippman SM, *et al.* (2003) Alleviating the  
6 suppression of glycogen synthase kinase-3 $\beta$  by Akt leads to the phosphorylation of  
7 cAMP-response element-binding protein and its transactivation in intact cell nuclei. *J Biol Chem*  
8 278: 41338-41346.
- 9 47. Fang D, Hawke D, Zheng Y, Xia Y, Meisenhelder J, Nika H, *et al.* (2007) Phosphorylation of  
10 beta-catenin by AKT promotes beta-catenin transcriptional activity. *J Biol Chem* 282:  
11 11221-11229.
- 12 48. Horman S, Vertommen D, Heath R, Neumann D, Mouton V, Woods A, *et al.* (2006) Insulin  
13 antagonizes ischemia-induced Thr172 phosphorylation of AMP-activated protein kinase  
14 alpha-subunits in heart via hierarchical phosphorylation of Ser485/491. *J Biol Chem* 281:  
15 5335-5340.
- 16 49. Hong F, Nguyen VA, Shen X, Kunos G, Gao B. (2000) Rapid activation of protein kinase B/Akt  
17 has a key role in antiapoptotic signaling during liver regeneration. *Biochem Biophys Res Commun*  
18 279: 974-979.
- 19 50. Yang H, Zhang Y, Zhao R, Wen YY, Fournier K, Wu HB, *et al.* (2006) Negative cell cycle  
20 regulator 14-3-3 sigma stabilizes p27 Kip1 by inhibiting the activity of PKB/Akt. *Oncogene* 25:  
21 4585-4594.
- 22 51. Venhuizen JH, Jacobs FJC, Span PN, Zegers MM. (2019) P120 and E-cadherin: Double-edged  
23 swords in tumor metastasis. *Semin Cancer Biol* 60: 107-120.
- 24 52. del Valle-Pérez B, Casagolda D, Lugilde E, Valls G, Codina M, Dave N, *et al.* (2016) Wnt  
25 controls the transcriptional activity of Kaiso through CK1 $\epsilon$ -dependent phosphorylation of  
26 p120-catenin. *J Cell Sci* 129: 873.
- 27 53. Yaffe MB, Rittinger K, Volinia S, Caron PR, Aitken A, Leffers H, *et al.* (1997) The structural  
28 basis for 14-3-3:phosphopeptide binding specificity. *Cell* 91: 961-971.



- 1 54. Qin S, Zhang B, Tian W, Gu L, Lu Z, Deng D. (2015) Kaiso mainly locates in the nucleus in vivo  
2 and binds to methylated, but not hydroxymethylated DNA. *Chinese Journal of Cancer Research*  
3 27: 148-155.
- 4 55. Singhal SK, Byun JS, Park S, Yan T, Yancey R, Caban A, *et al.* (2021) Kaiso (ZBTB33)  
5 subcellular partitioning functionally links LC3A/B, the tumor microenvironment, and breast  
6 cancer survival. *Commun Biol* 4(1):150.
- 7 56. Kim SW, Park JI, Spring CM, Sater AK, Ji H, Otchere AA, *et al.* (2004) Non-canonical Wnt  
8 signals are modulated by the Kaiso transcriptional repressor and p120-catenin. *Nat Cell Biol* 6:  
9 1212-1220.
- 10 57. Robinson SC, Chaudhary R, Jim énez-Saiz R, Rayner LGA, Bayer L, Jordana M, *et al.* (2019)  
11 Kaiso-induced intestinal inflammation is preceded by diminished E-cadherin expression and  
12 intestinal integrity. *PLoS One* 14(6): e0217220.
- 13

## 1 **Figure Legends**

2 **Figure 1.** Different phosphorylation states of Kaiso protein in the cytoplasm and nucleus of cells *in*  
3 *vitro* and *in vivo*. (A) The phosphorylation statuses of GFP-Kaiso stably transfected MGC803 cells and  
4 the corresponding xenograft tissues in the Phos-tag SDS-PAGE analysis. (B) The phosphorylation  
5 statuses of endogenous cytoplasmic and nuclear Kaiso in MGC803 cells were validated using  
6 anti-phosphoSer/Thr/Tyr universal antibody. (C) Subcellular location of endogenous pT606-Kaiso and  
7 total Kaiso in cytoplasmic and nuclear proteins (with and without de-phosphorylation treatment by  
8 CIAP for 30 min) extracted from 3 cancer cell lines in Western blotting. (D) Locations of pT606-Kaiso  
9 and total Kaiso in the cytoplasm and nucleus in an indirect immunofluorescence confocal analysis. (E)  
10 Locations of pT606-Kaiso and total Kaiso in a representative gastric carcinoma and the paired normal  
11 tissues in IHC analysis. (F) Locations of pT606-Kaiso and total Kaiso in human gastric tissues in the  
12 indirect immunofluorescence confocal analysis.

13 **Figure 2.** AKT1 increases the phosphorylation of Kaiso at T606. (A) A conservative RSXTXP motif  
14 within Kaiso of human and other species (B) After starvation overnight, treatments of Insulin (100  
15 ng/mL), IL-6 (10 ng/mL) and fetal bovine serum (FBS, 1:10000 v/v) for 15 min increased the  
16 phosphorylation level of endogenous Kaiso in MGC803 cells. (C) Effects of AKT inhibitor MK2206  
17 treatment (10  $\mu$ mol/mL) for 30 min blocked the promotion of Insulin induced Kaiso phosphorylation as  
18 pAKT substrate in MGC803 cells. (D) *AKT1* overexpression at different doses increased the amount of  
19 phosphorylated AKT substrate (pAKT-sub) in Kaiso complexes immunoprecipitated by Kaiso antibody  
20 in MGC803 cells. (E) The activity comparison of three kinase candidates to phosphorylate Kaiso at  
21 T606 in MGC803 and BGC823 cells. (F) The T606-phosphorylation status of endogenous Kaiso in  
22 MGC803 and BGC823 with *AKT1* overexpression after starvation overnight.

23 **Figure 3.** Kaiso interacted with 14-3-3 family members depending on Kaiso pT606. (A) After the  
24 plasmids of 14-3-3 family members and GST-Kaiso were co-transfected into MGC803 cells,  
25 GST-Kaiso pulled down various isoforms of 14-3-3 family, especially 14-3-3 $\sigma$ . (B) Endogenous Kaiso  
26 immunoprecipitated pan-14-3-3 or 14-3-3 $\sigma$  protein immunoprecipitated endogenous Kaiso in MGC803

1 cell in Co-IP analysis. (C) T606A mutation of Kaiso concealed its interaction with pan-14-3-3 in  
2 MGC803 cells in Co-IP analysis.

3 **Figure 4.** 14-3-3 proteins promote the cytoplasmic accumulation of Kaiso in Kaiso T606  
4 phosphorylation-dependent manner. (A) The subcellular location of endogenous Kaiso in MGC803  
5 cells with or without 14-3-3 $\gamma$  or 14-3-3 $\sigma$  overexpression by indirect immunofluorescence staining assay.  
6 (B) Proportion of Kaiso in the nucleus and in cytoplasm of MGC803 cells with and without 14-3-3 $\gamma$  or  
7 14-3-3 $\sigma$  overexpression. (C) Western blot for detecting the amounts of endogenous Kaiso in cytoplasm  
8 and nucleus protein in MGC803 cells with 14-3-3 $\sigma$  overexpression. (D) Comparison of the levels of  
9 GFP-Kaiso (wild type) or T606A mutant in the cytoplasm and nucleus in MGC803 cell with and  
10 without 14-3-3 $\sigma$  overexpression.

11 **Figure 5.** 14-3-3 $\sigma$  promotes the interaction of Kaiso and p120ctn in the cytoplasm. (A) More  
12 Kaiso-p120 complex was immunoprecipitated by Kaiso antibody in MGC803 cells with 14-3-3 $\sigma$   
13 overexpression in Co-IP assay. Total protein levels of p120ctn and 14-3-3 $\sigma$  in the lysate of MGC803  
14 cells with 14-3-3 $\sigma$  overexpression were displayed in the right side. (B) Alterations of interactions  
15 between Kaiso and p120ctn proteins in the cytoplasm and nucleus of these cells with 14-3-3 $\sigma$   
16 overexpression in the Co-IP assay using Kaiso antibody. (C) The subcellular locations of Kaiso,  
17 p120ctn, and mCherry-14-3-3 $\sigma$  in MGC803 cells. (D) Western blotting images for detecting effect of  
18 *p120ctn* knockdown and 14-3-3 $\sigma$  overexpression on distribution of Kaiso in the cytoplasm and nucleus  
19 of MGC803 cells. (E) The levels of total p120ctn and Kaiso proteins in the lysate of MGC803 cells  
20 with 14-3-3 $\sigma$  overexpression and siRNAs knockdown of *p120ctn* expression.

21 **Figure 6.** Effects of 14-3-3 $\sigma$  on inhibition of Kaiso's target gene *CDH1* expression. (A) The Pearson  
22 correlation coefficient between mRNA levels of 14-3-3 family members and Kaisos' target genes in  
23 public RNA-seq datasets from Cancer Cell Line Encyclopedia (CCLE, 1156 cancer cell lines) and  
24 Genotype-Tissue Expression (GTEx, 11688 human normal tissues). (B) The level of *CDH1* in  
25 SGC7901 and MKN45 cells with or without wild type Kaiso and 14-3-3 $\sigma$  overexpression. (C) The  
26 level of the *CDH1* mRNA in SGC7901 and MKN45 cells with or without wild type Kaiso and 14-3-3 $\sigma$   
27 overexpression (D) The amounts of pT606-Kaiso, total Kaiso, 14-3-3  $\sigma$ , and CDH1 proteins in gastric

1 carcinoma (T) and the paired normal tissues (N) from 12 patients by Western blotting. (E) Correlation  
2 between ratios of pT606-Kaiso to total Kaiso and CDH1 to GAPDH proteins based on the density of  
3 these proteins in Western blot.

4 **Figure 7.** Effect of wildtype Kaiso and its T606A mutant on gastric cancer cell migration and invasion  
5 in vitro and growth in vivo. (A) The percentage of open wounds was calculated to determine the  
6 migration of gastric cancer (GC) SGC7901 and MKN45 cells overexpressing Kaiso-WT or its T606A  
7 mutant (a/b/c: Kaiso-WT vs. Ctrl/Kaiso-T606A vs. Ctrl/Kaiso-T606A vs. Kaiso-wt,  $p < 0.05$ ); The  
8 results of Western blot were also inserted to illustrate the status of Kaiso overexpression; (B and C) The  
9 results of transwell assays to show the migration and invasion of GC cells overexpressing Kaiso-WT or  
10 Kaiso-T606A mutant, respectively; (D) Tumors derived from SGC7901 cells transfected with  
11 Kaiso-WT and its T606A mutant or empty vector control. \*/\*\*/\*\*\*:  $p < 0.05/0.01/0.001$

12

1 **Figures**

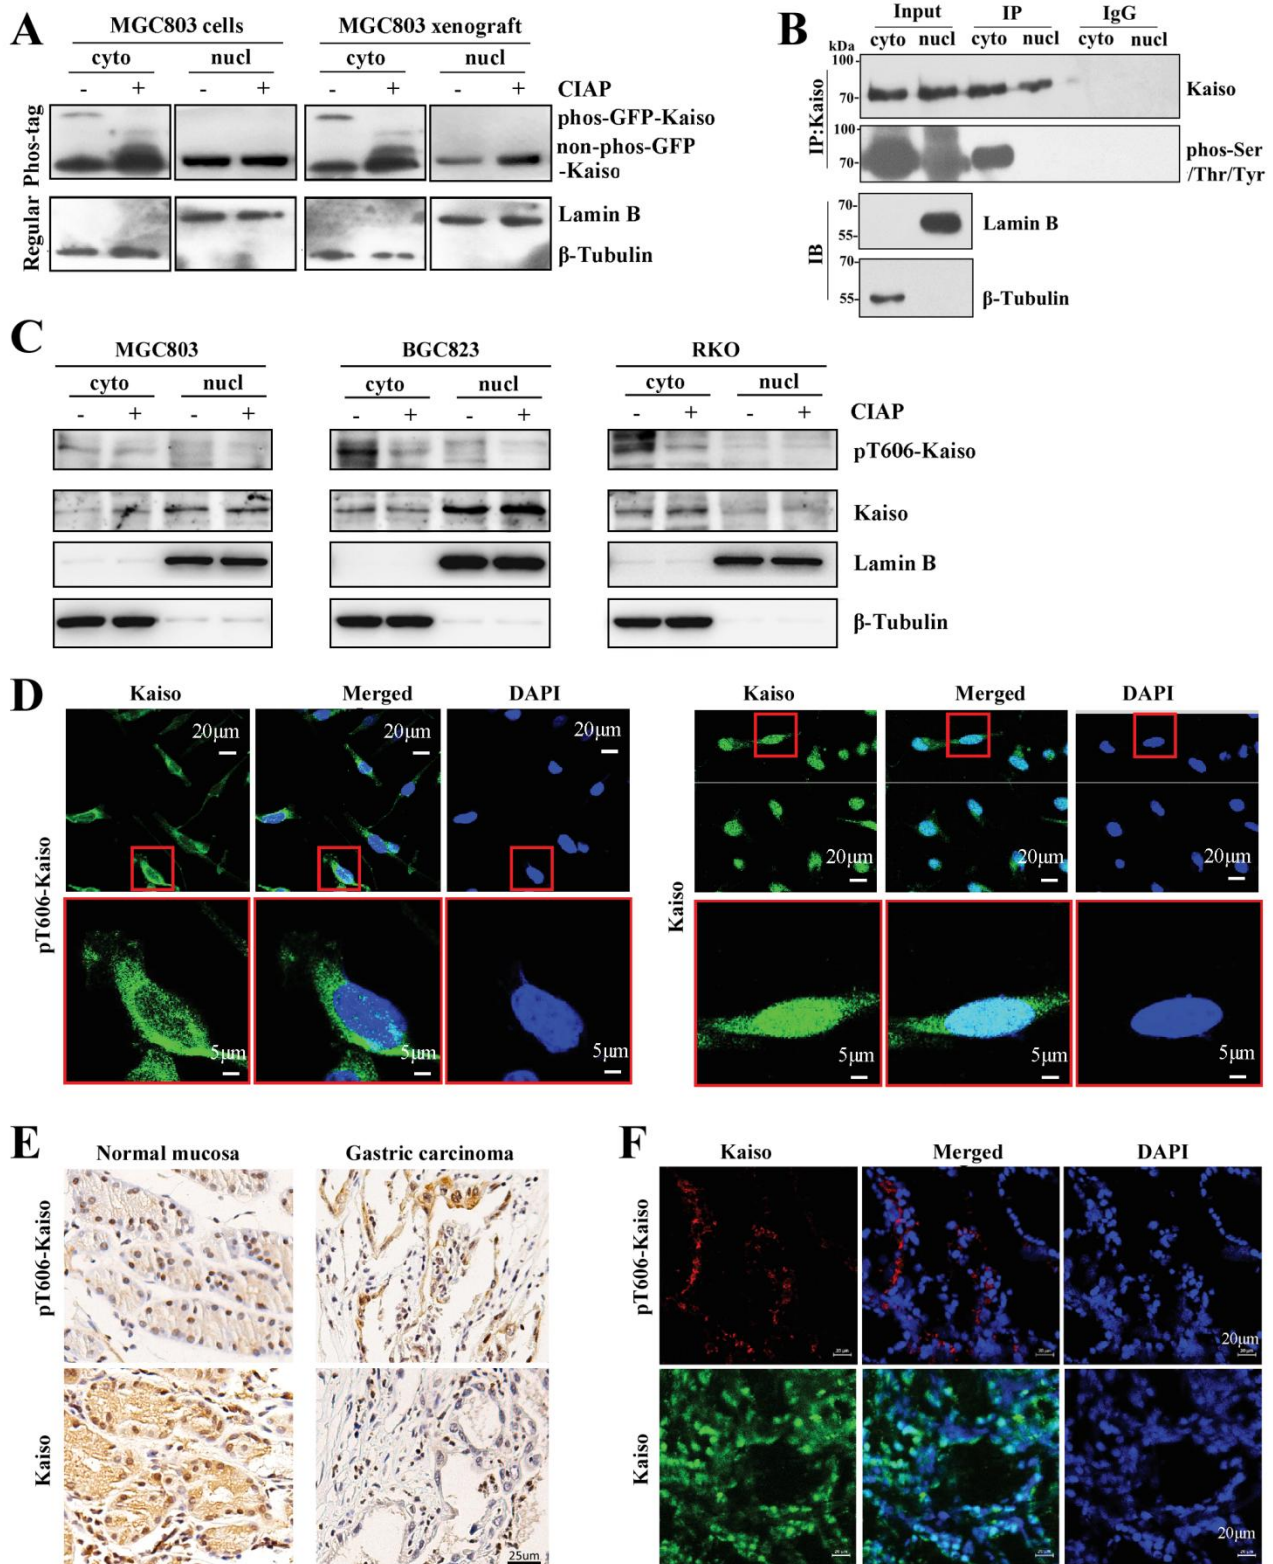

[Fig.1]

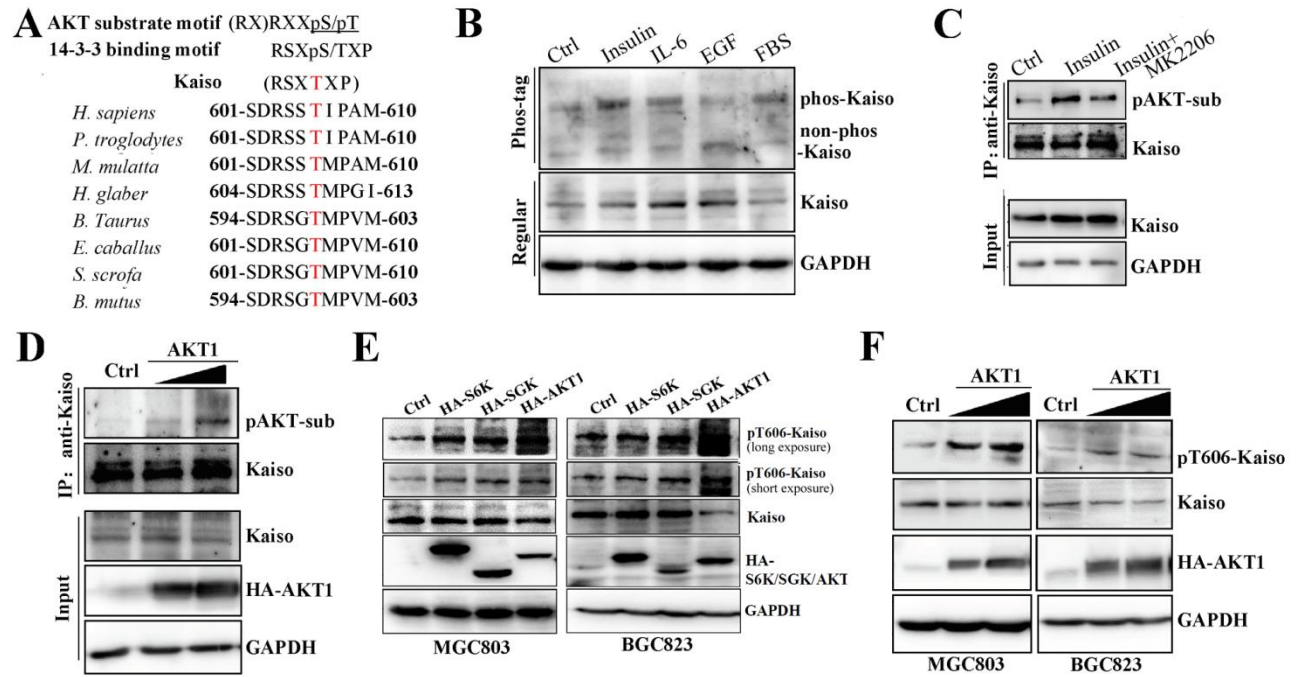

[Fig.2]

1  
2



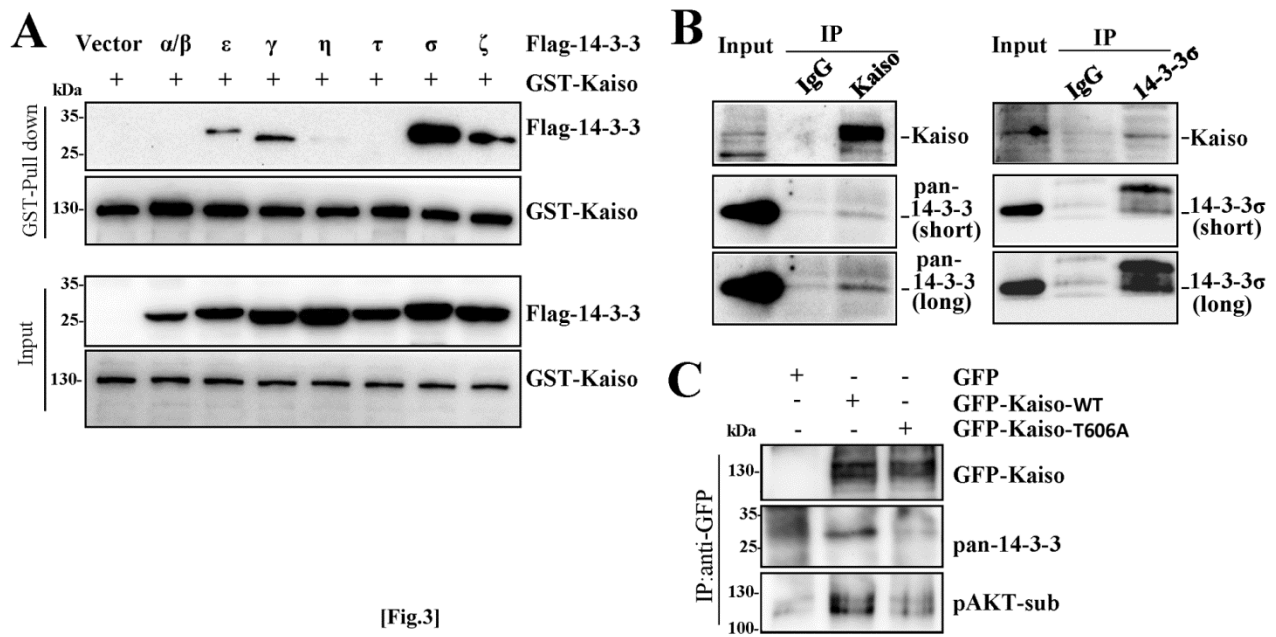

[Fig.3]

1

2

1

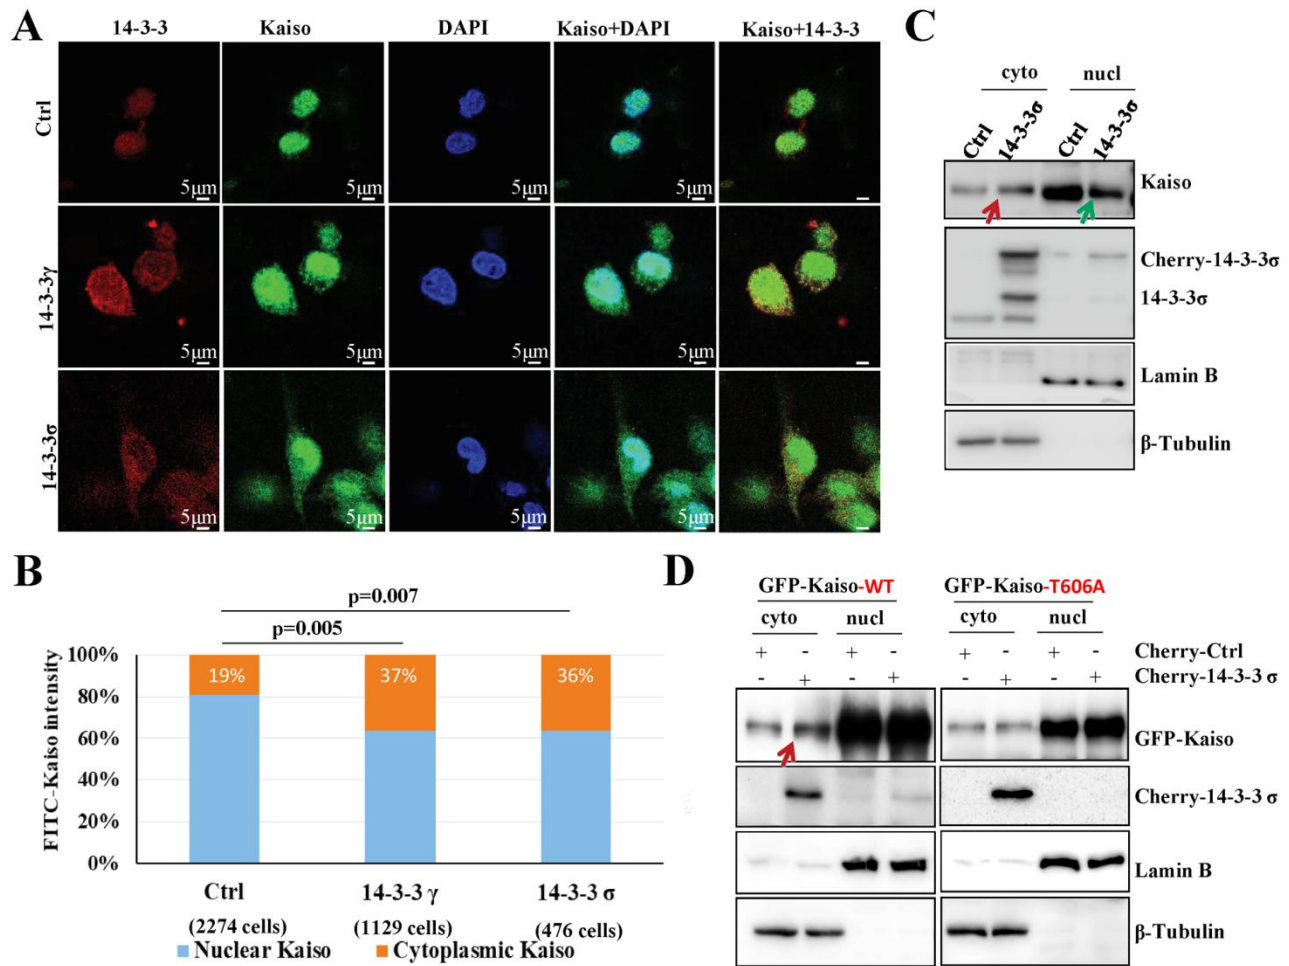

[Fig.4]

2



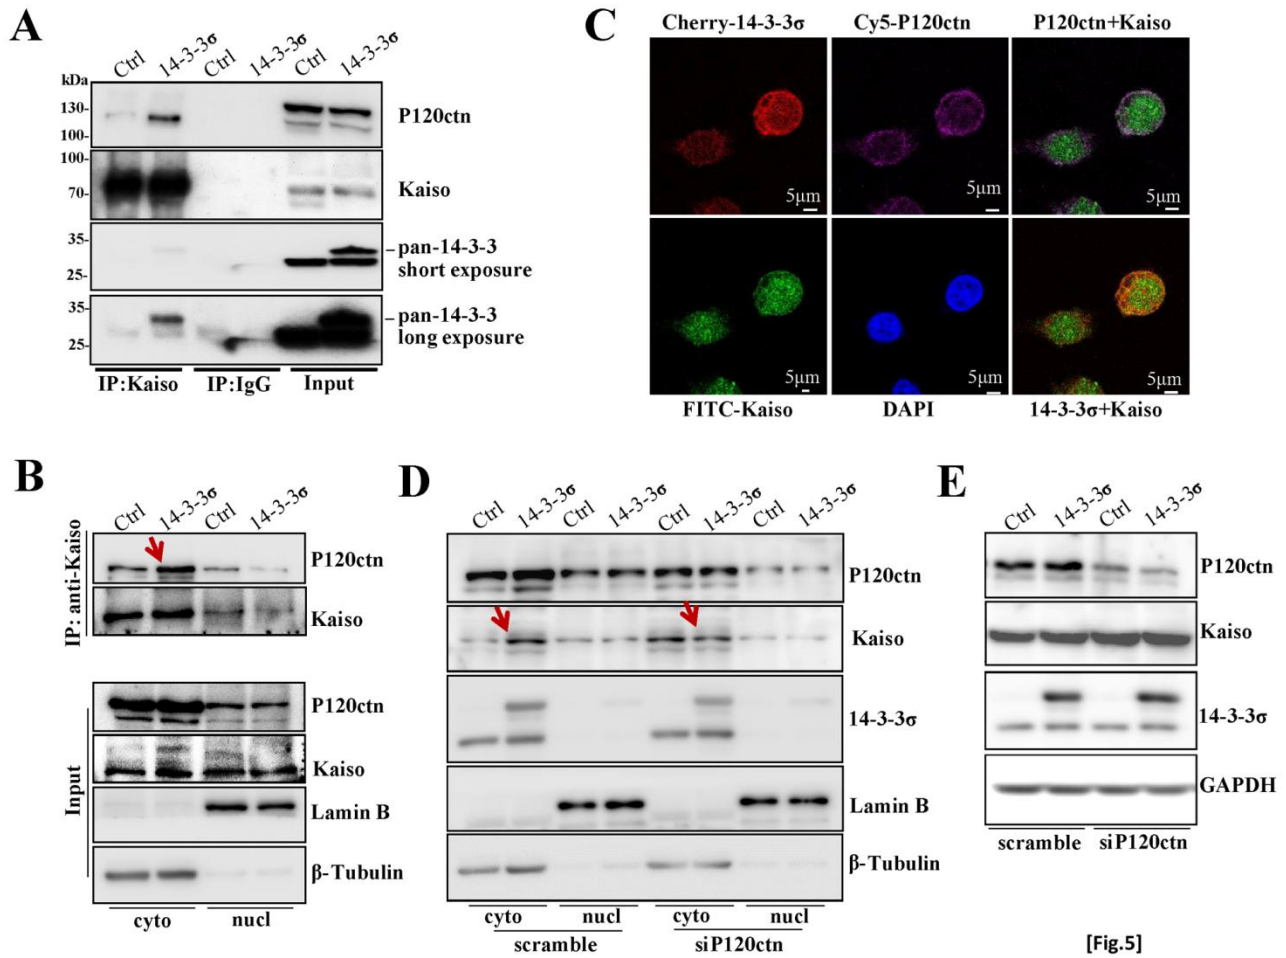

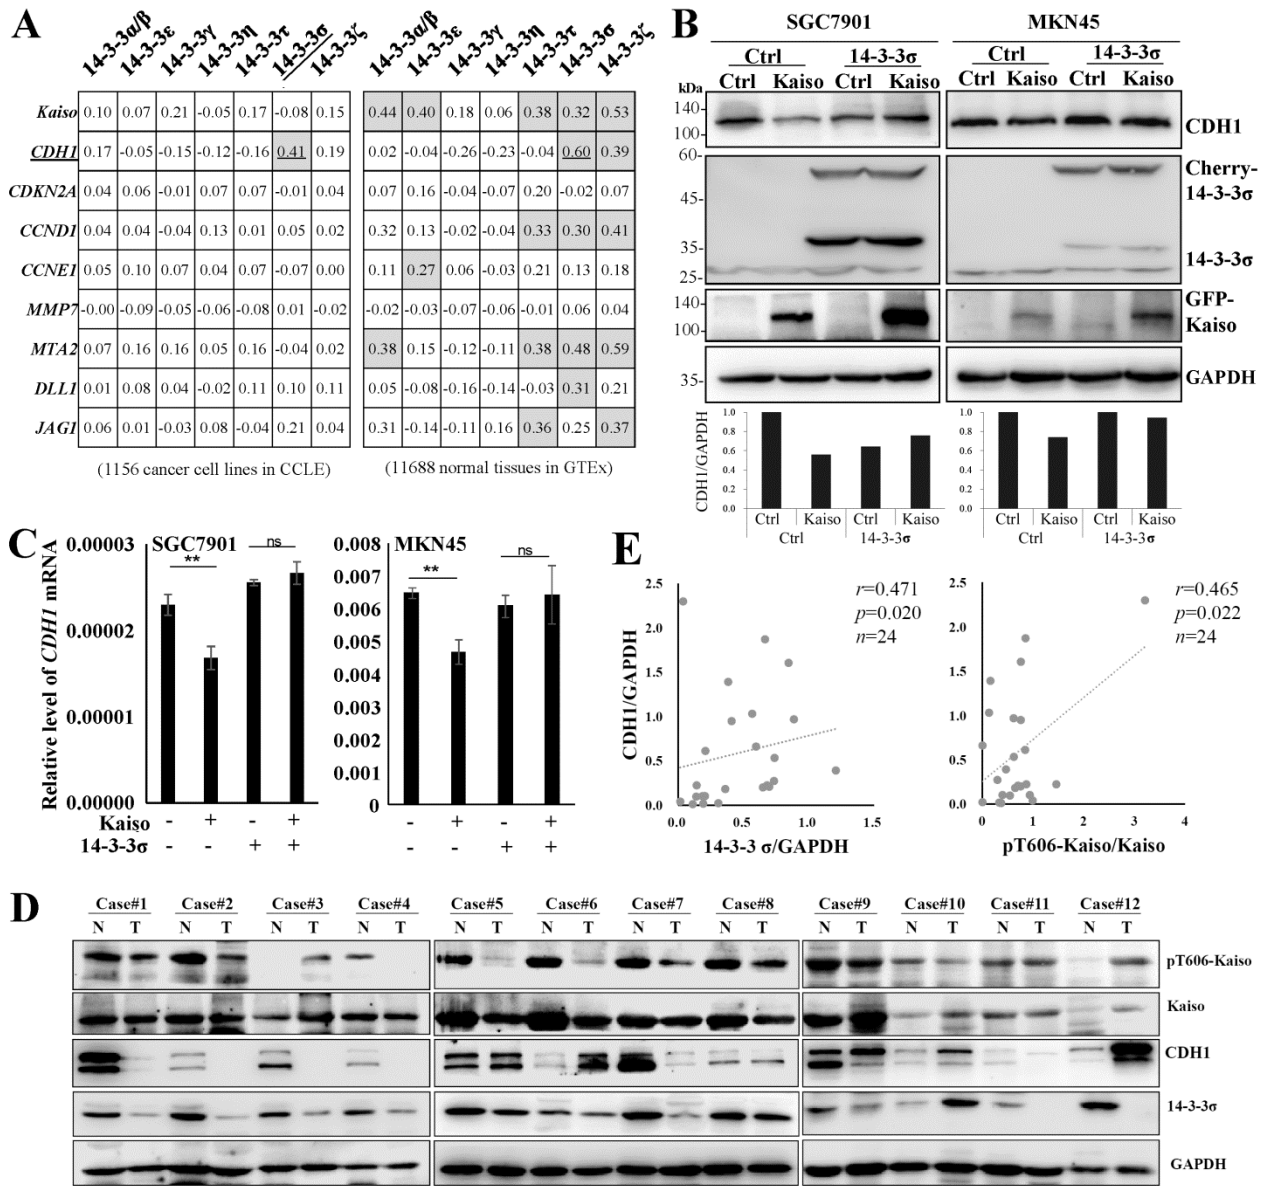

[Fig.6]

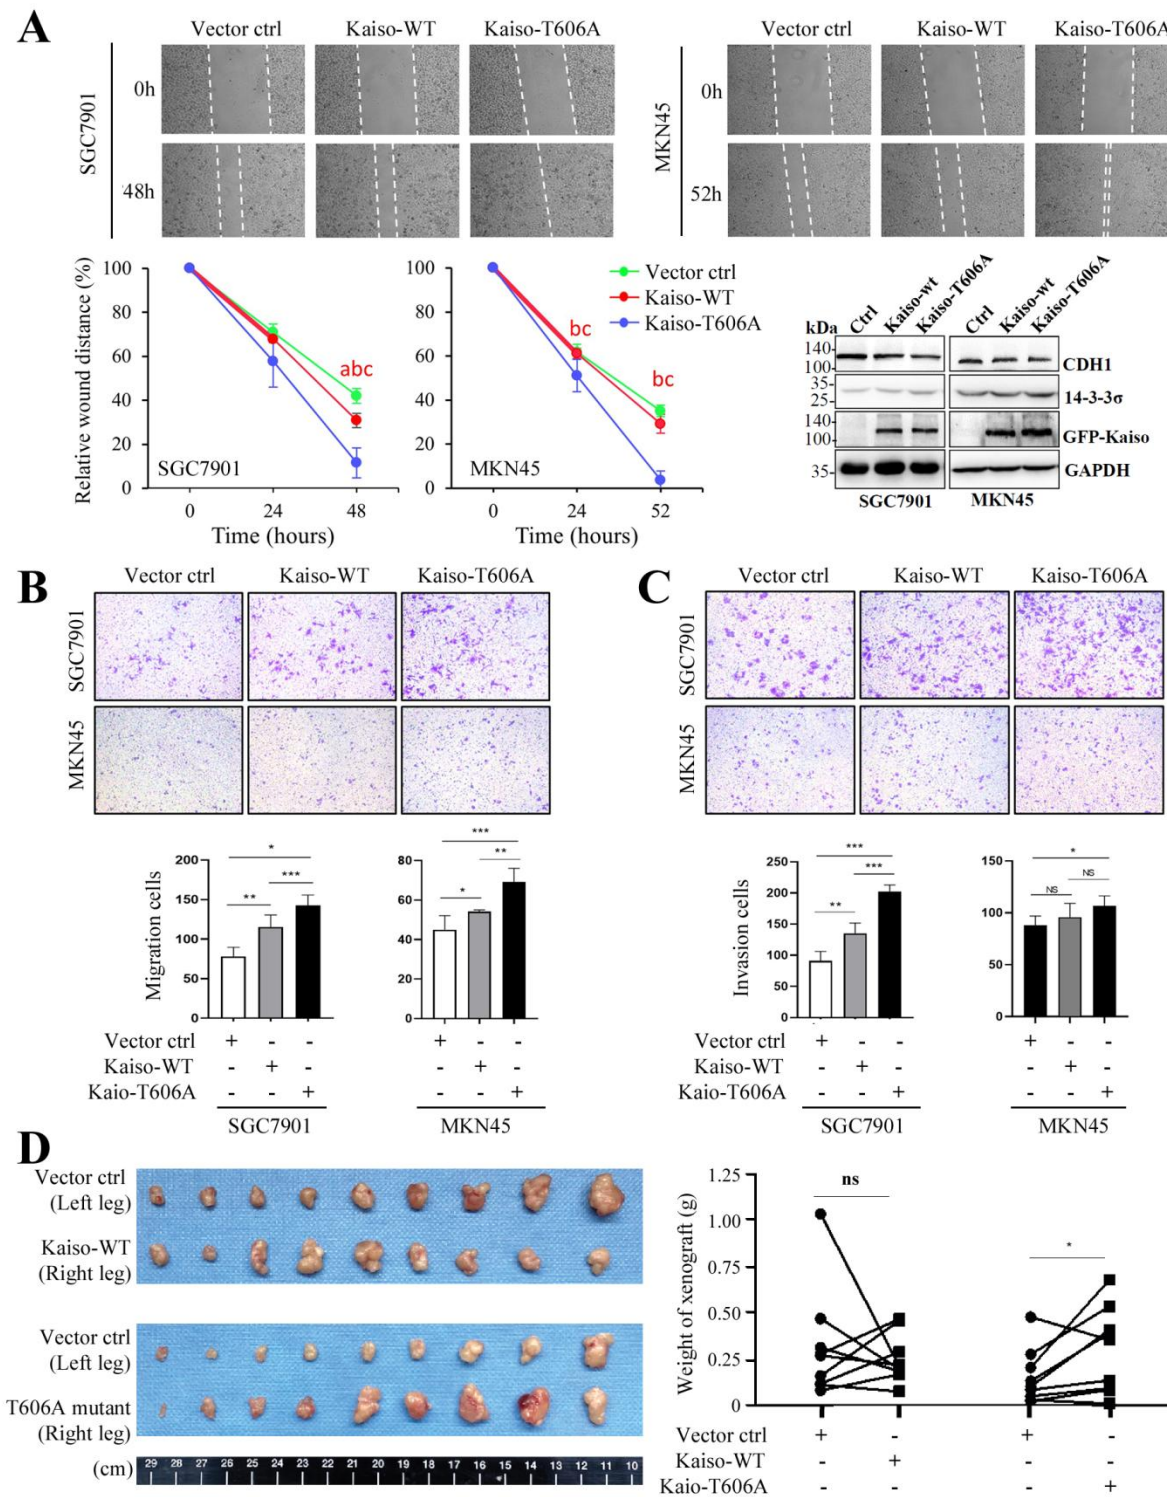

[Fig.7]

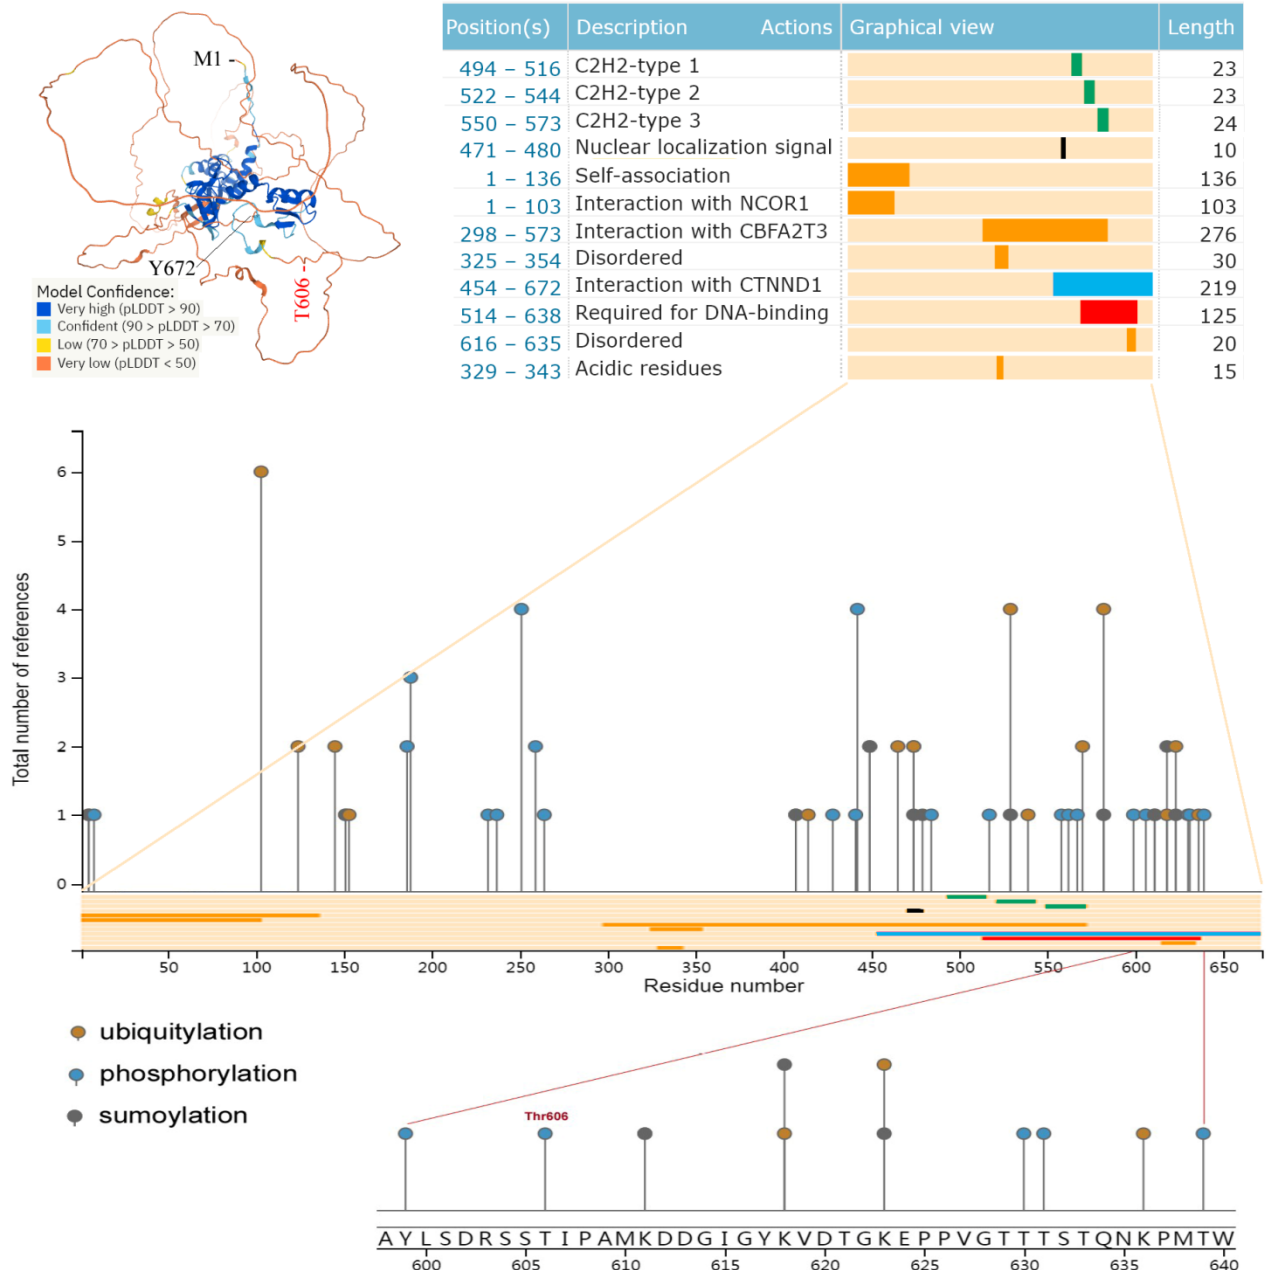

1

2 **Figure S1.** The status of Kaiso structure and protein modifications detected by LC/MS. Phosphorylation at the Thr606  
 3 residue in the LSDRSSTIPAM motif was illustrated in the bottom chart in details. The image was adapted with graphs  
 4 for Kaiso modifications from the web site ([www.phosphosite.org](http://www.phosphosite.org)) (42, 43). AlphaFold predicted 3D structures for  
 5 Kaiso (ZBTB33/Q86T24) protein was adapted from images downloaded from the website (<https://alphafold.ebi.ac.uk>)  
 6 [44]; pLDDT, AlphaFold produced per-residue confidence score between 0 and 100. Information for Kaiso domains  
 7 was adapted from images downloaded from the website (<https://www.uniprot.org/uniprot/Q86T24>) (1, 45).

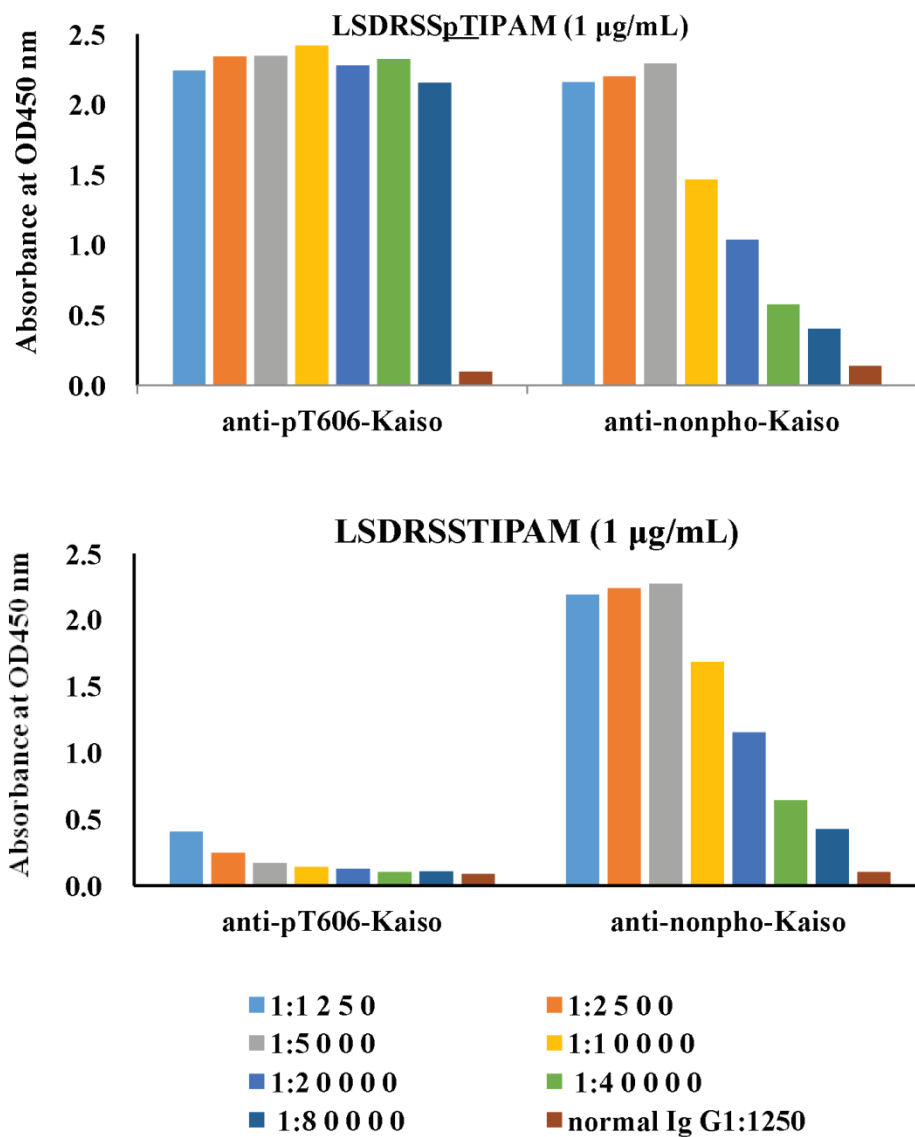

1

2 **Figure S2.** Characterizing the specificity of pT606-Kaiso polyclonal antibody. ELISA results for the specificity of  
 3 pT606-Kaiso and control antibodies against the pT606-Kaiso peptide (LSDRSSpTIPAM, the top chart) and for the  
 4 specificity of pT606-Kaiso and control antibodies for the nonphosphorylated control peptide (LSDRSSTIPAM, the  
 5 bottom chart).

6



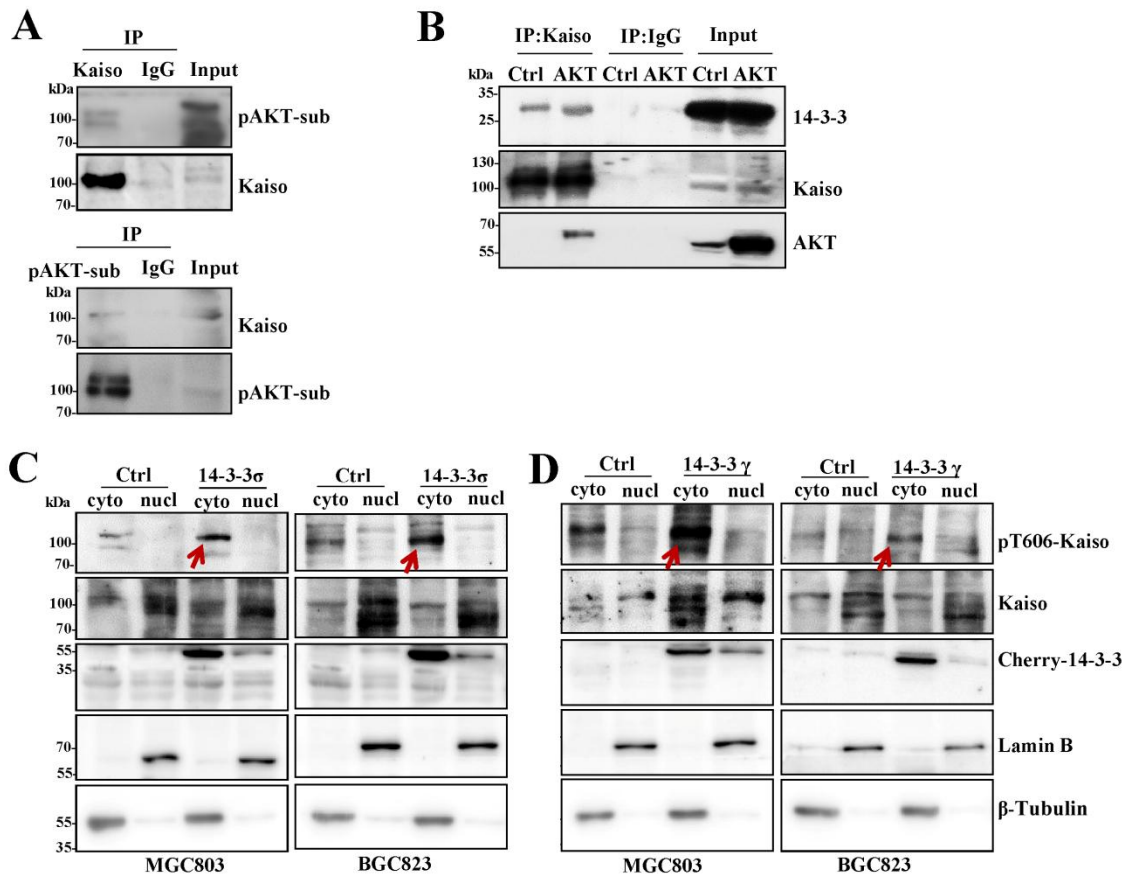

[Fig.S3]

1

2 **Figure S3.** AKT1 and 14-3-3 regulate the T606-phosphorylation and subcellular localization of endogenous Kaiso. (A)  
3 Endogenous Kaiso in MGC803 cells immunoprecipitated by Kaiso antibody was identified by the antibody specific  
4 for AKT substrate motif, and the immunoprecipitation by AKT substrate antibody was identified by antibody against  
5 Kaiso. (B) *AKT1* overexpression increased endogenous Kaiso-14-3-3 interaction in MGC803 cells in Co-IP assay. (C  
6 and D) The T606-phosphorylation states of endogenous Kaiso in the cytoplasm and nucleus of MGC803 and BGC823  
7 cells with 14-3-3 $\sigma$  and 14-3-3 $\gamma$  overexpression, respectively.

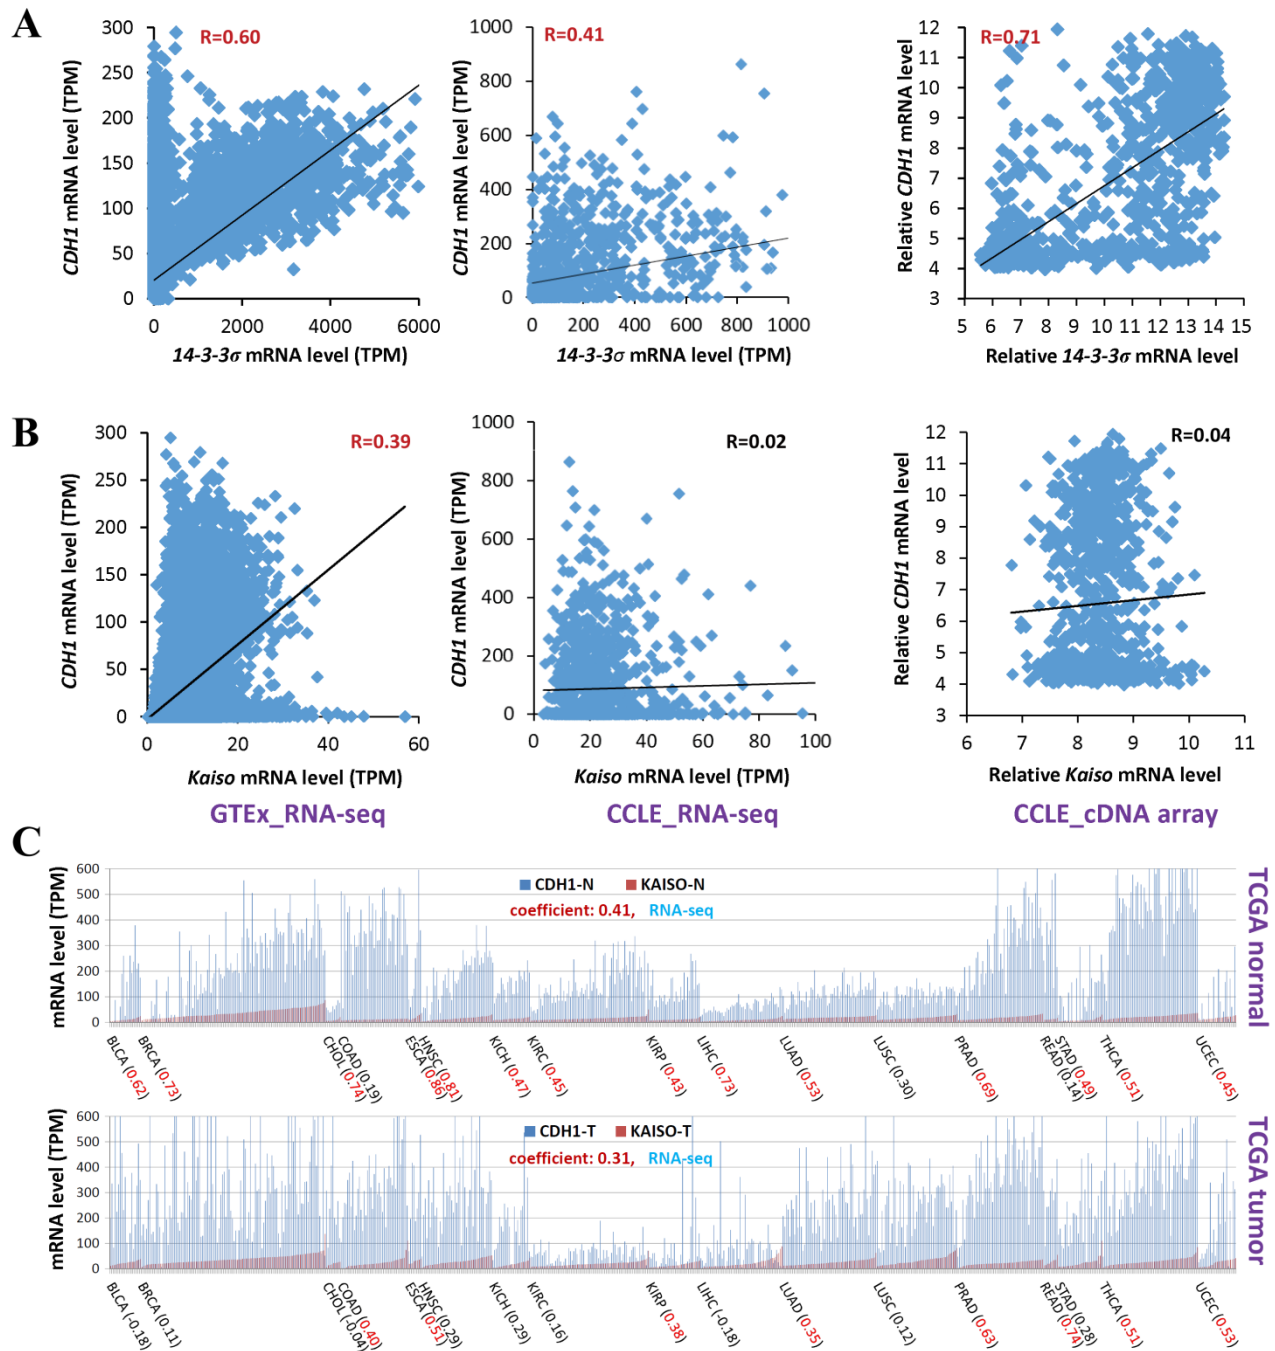

1

2 **Figure S4.** Correlation between the levels of *CDH1* and *14-3-3 $\sigma$*  or *Kaiso/ZBTB33* mRNAs in RNA-seq and cDNA  
3 array datasets. (A and B) Human normal tissues in the Genotype-Tissue Expression (GTEx) project and cancer cell  
4 lines in Cancer Cell Line Encyclopedia (CCLE) project; (C) Human tumor tissue and the paired normal tissue samples  
5 from patients in the Cancer Genome Atlas (TCGA) project. Gene expression coefficient is labeled within parentheses  
6 for each kind of tissues.
